# Supplementary material for: Identification and Verification of Novel Biomarkers Involving Rheumatoid Arthritis with Multimachine Learning Algorithms: An In Silicon and In Vivo Study
Source: Hindawi journal article supplement (doi:10.1155/2024/3188216), 2024-02-14

Figure S3

A

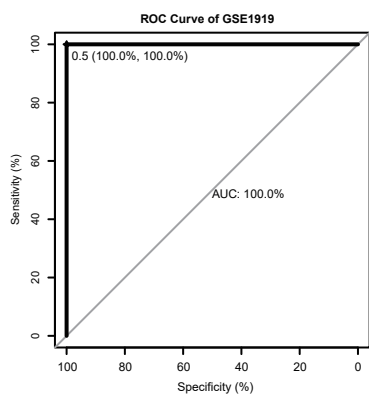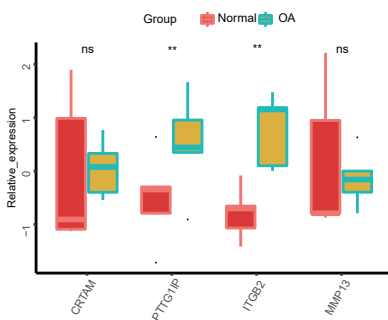

B

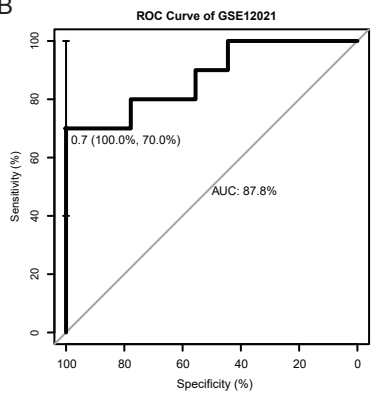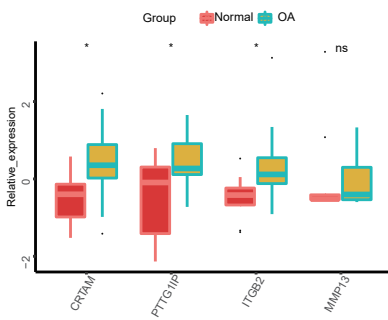

C

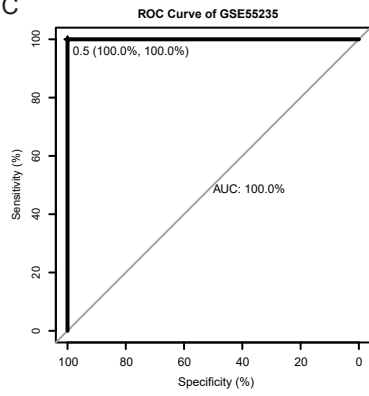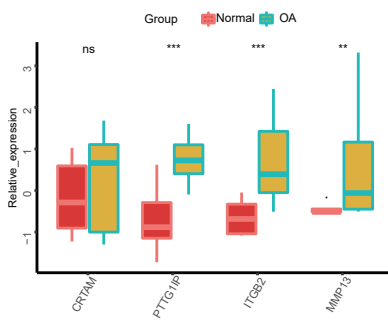

D

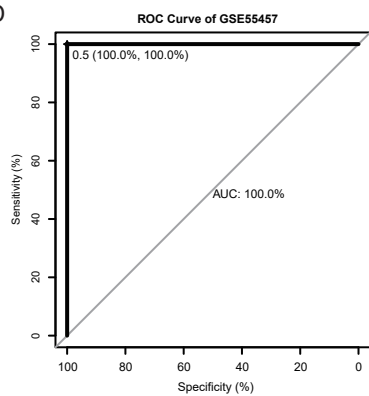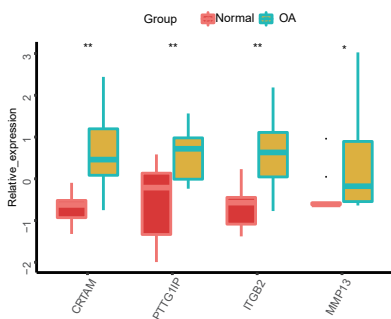

E

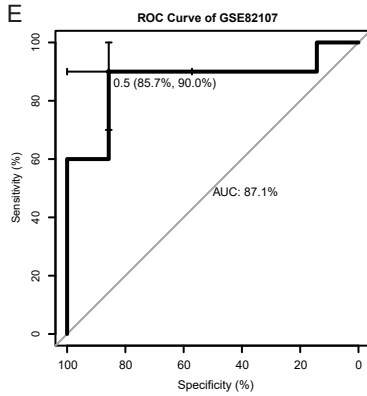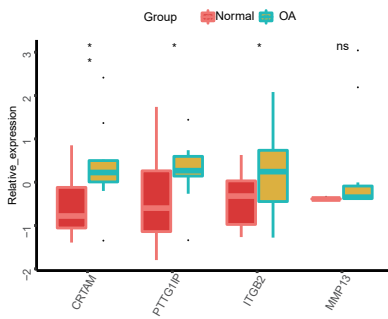

Supplement: f4 [file 3188216.f4.pdf]
