# Supplementary material for: Identification and Verification of Novel Biomarkers Involving Rheumatoid Arthritis with Multimachine Learning Algorithms: An In Silicon and In Vivo Study
Source: Mediators Inflamm. 2024 Feb 14;2024:3188216. doi: 10.1155/2024/3188216 (PMC10881253; doi:10.1155/2024/3188216)
Supplement: Supplementary 6 — Correlation of CRTAM with remained mRNA in RA tissues. [file 3188216.f6.txt]

	symbol	correlation	pvalue
1	5S_rRNA	0.015923022	0.845624684
2	7SK	0.007483353	0.927094799
3	7SK:ENSG00000260682	0.595344072	6.01E-16
4	A1BG	0.486427837	2.11E-10
5	A1BG-AS1	0.648927455	1.56E-19
6	A1CF	-0.183338415	0.023766208
7	A2M	0.190398895	0.018795972
8	A2M-AS1	0.461143133	2.25E-09
9	A2ML1	-0.18459258	0.022808673
10	A2MP1	0.001448544	0.985869056
11	A3GALT2	-0.0232963	0.775733176
12	A4GALT	-0.330604056	3.18E-05
13	A4GNT	0.266086607	0.000921702
14	AAAS	0.246637002	0.002190519
15	AACS	-0.018080711	0.825020877
16	AACSP1	-0.181846502	0.024950033
17	AADAC	-0.076131303	0.351225254
18	AADACL2	-0.084727624	0.299346067
19	AADACL3	-0.35076722	9.40E-06
20	AADAT	-0.303514375	0.000144024
21	AAED1	0.18707886	0.021008183
22	AAGAB	0.442669809	1.13E-08
23	AAK1	0.380083128	1.37E-06
24	AAMDC	-0.127301156	0.118079967
25	AAMP	0.269868766	0.000772942
26	AANAT	0.079969289	0.327402949
27	AAR2	0.245047881	0.002344315
28	AARD	-0.01618824	0.843086177
29	AARS	0.422550192	5.87E-08
30	AARS2	0.241156337	0.002763108
31	AARSD1	0.099643048	0.221941004
32	AASDH	0.32449786	4.53E-05
33	AASDHPPT	0.412302619	1.31E-07
34	AASS	-0.35086613	9.35E-06
35	AATF	0.484092811	2.64E-10
36	AATK	-0.160873626	0.04771185
37	AB000466	0.003842552	0.962526571
38	AB007962	-0.011860175	0.884695006
39	AB062081	0.070561941	0.387674659
40	AB062083	0.236834498	0.003306561
41	AB073649	-0.063331701	0.438257713
42	AB074160	-0.276898197	0.000553512
43	AB074162	-0.054849218	0.502125088
44	AB074166	0.285628196	0.000361097
45	AB074188	-0.162904142	0.044935973
46	AB075489	0.201316265	0.01288174
47	AB075492	0.253613862	0.001617907
48	AB209061	0.242405332	0.002621855
49	AB209185	0.323908855	4.69E-05
50	AB209315	0.424430327	5.05E-08
51	AB209621	0.030211426	0.71176916
52	AB231710	-0.000269254	0.997373226
53	AB231711	0.025236646	0.757611369
54	AB231729	0.228316478	0.004667845
55	AB231731	0.132580428	0.103468867
56	AB429224	-0.044863057	0.583129349
57	AB488780	-0.104959547	0.198127847
58	AB586698	0.031522576	0.699849174
59	ABAT	0.327639823	3.78E-05
60	ABCA1	0.421915533	6.17E-08
61	ABCA10	-0.394929901	4.78E-07
62	ABCA11P	-0.170251965	0.035992266
63	ABCA12	-0.128667719	0.114152414
64	ABCA13	-0.135953588	0.094904468
65	ABCA17P	-0.321260854	5.45E-05
66	ABCA2	-0.21251257	0.008576318
67	ABCA3	-0.396888183	4.14E-07
68	ABCA4	-0.141356084	0.082369192
69	ABCA5	-0.247310009	0.002128191
70	ABCA6	-0.008514059	0.917087017
71	ABCA7	0.396623849	4.22E-07
72	ABCA8	-0.380546917	1.32E-06
73	ABCA9	-0.186142762	0.021671146
74	ABCB1	0.079992776	0.327260443
75	ABCB10	0.272276218	0.000690102
76	ABCB11	0.120350773	0.139700007
77	ABCB4	-0.011166728	0.891394055
78	ABCB5	-0.177081404	0.029075461
79	ABCB6	-0.144265409	0.076190767
80	ABCB7	0.285591693	0.000361753
81	ABCB8	0.133384122	0.101375062
82	ABCB9	0.193140873	0.017123913
83	ABCC1	0.133188596	0.101881349
84	ABCC10	0.392244656	5.80E-07
85	ABCC11	-0.054889287	0.501812361
86	ABCC12	-0.077619762	0.341860313
87	ABCC13	-0.295959925	0.000213902
88	ABCC2	-0.126028806	0.121830339
89	ABCC3	0.294118548	0.000235168
90	ABCC4	0.481299691	3.46E-10
91	ABCC5	0.158523295	0.05110163
92	ABCC5-AS1	-0.074291037	0.363023849
93	ABCC6	-0.142007898	0.080951122
94	ABCC6P1	-0.064854061	0.427305899
95	ABCC6P2	-0.125499988	0.123415937
96	ABCC8	-0.336902231	2.20E-05
97	ABCC9	-0.272724359	0.000675614
98	ABCD1	0.31032699	9.99E-05
99	ABCD2	0.205966231	0.010905392
100	ABCD3	0.034294543	0.6748912
101	ABCD4	0.154820284	0.056845684
102	ABCE1	0.346007652	1.26E-05
103	ABCF1	0.351935776	8.74E-06
104	ABCF2	0.282931103	0.000412647
105	ABCF3	0.362184066	4.54E-06
106	ABCG1	0.536967982	9.93E-13
107	ABCG2	-0.092887391	0.255036229
108	ABCG4	-0.134091815	0.099559149
109	ABCG5	-0.278950985	0.000501244
110	ABCG8	-0.364112914	4.00E-06
111	ABHD1	-0.123595256	0.129259484
112	ABHD10	0.365166866	3.73E-06
113	ABHD11	0.338632686	1.98E-05
114	ABHD12	0.453008231	4.63E-09
115	ABHD12B	-0.223206222	0.00570773
116	ABHD13	0.215082045	0.007790017
117	ABHD14A	0.194092009	0.016574885
118	ABHD14A-ACY1	-0.058088368	0.477177097
119	ABHD14B	0.201403443	0.012841978
120	ABHD15	0.16948072	0.036854243
121	ABHD16A	0.593235509	8.06E-16
122	ABHD16B	-0.168432176	0.038054005
123	ABHD17A	0.187253509	0.02088645
124	ABHD17B	0.382219334	1.18E-06
125	ABHD17C	0.346998037	1.19E-05
126	ABHD2	-0.060719459	0.45741743
127	ABHD3	0.679687256	6.13E-22
128	ABHD4	0.03252765	0.690760929
129	ABHD5	-0.078947064	0.333644031
130	ABHD6	0.194489826	0.016349831
131	ABHD8	0.364997731	3.78E-06
132	ABI1	0.500427691	5.21E-11
133	ABI2	-0.133037741	0.10227333
134	ABI3	0.614143217	3.96E-17
135	ABI3BP	-0.281375954	0.000445382
136	ABL1	-0.216811055	0.007297567
137	ABL2	-0.054001296	0.5087668
138	ABLIM1	-0.480416861	3.76E-10
139	ABLIM2	-0.213195456	0.008360772
140	ABLIM3	-0.391172091	6.26E-07
141	ABO	-0.224876723	0.005347047
142	ABP1	0.292271917	0.000258453
143	abParts	0.619235316	1.84E-17
144	ABR	0.049967703	0.540974608
145	ABRA	-0.235932426	0.003431481
146	ABRACL	0.602492065	2.18E-16
147	ABT1	0.484001247	2.66E-10
148	ABTB1	-0.170189411	0.03606154
149	ABTB2	-0.50884564	2.18E-11
150	AC002064.5:ENSG00000225498	-0.299936482	0.000173931
151	AC002331.1:ENSG00000236481	0.249960569	0.001898065
152	AC002398.5:ENSG00000225872	0.00818631	0.920268011
153	AC002480.2:ENSG00000238033	0.271112312	0.000729074
154	AC002511.2:ENSG00000233214	-0.046911994	0.566027629
155	AC002511.3:ENSG00000232680	0.043741852	0.592587486
156	AC003005.2:ENSG00000268266	0.040661572	0.618923209
157	AC003051.1:ENSG00000227517	0.174773433	0.031274074
158	AC003092.1:ENSG00000236453	0.050200891	0.53908552
159	AC003682.16:ENSG00000268392	0.003033614	0.970411452
160	AC004012.1:ENSG00000233942	-0.066259253	0.417338536
161	AC004014.3:ENSG00000229603	-0.157721718	0.052302409
162	AC004019.18:ENSG00000272675	-0.231869164	0.004048522
163	AC004051.2:ENSG00000246774	-0.16389471	0.043631508
164	AC004069.2:ENSG00000251259	0.178892983	0.027443272
165	AC004156.3:ENSG00000267666	-0.010622757	0.896654492
166	AC004158.2:ENSG00000261008	0.306573409	0.00012233
167	AC004257.3:ENSG00000270143	0.003687255	0.964040022
168	AC004448.2:ENSG00000227078	-0.289252981	0.000301176
169	AC004448.5:ENSG00000235979	-0.010695826	0.895947622
170	AC004471.10:ENSG00000272682	-0.16755544	0.039082265
171	AC004510.3:ENSG00000267308	-0.14320815	0.078391257
172	AC004540.5:ENSG00000214870	0.105638385	0.195225838
173	AC004543.2:ENSG00000237921	0.00044359	0.995672453
174	AC004775.5:ENSG00000272203	-0.27192457	0.000701669
175	AC004791.2:ENSG00000267453	-0.007624166	0.925726847
176	AC004840.8:ENSG00000230914	0.043772801	0.59232548
177	AC004895.4:ENSG00000231704	-0.035683199	0.662517928
178	AC004947.2:ENSG00000233760	-0.256594114	0.001417863
179	AC005022.1:ENSG00000224017	-0.125764518	0.122620792
180	AC005029.1:ENSG00000232458	-0.156935031	0.053503502
181	AC005083.1:ENSG00000233834	0.38042645	1.33E-06
182	AC005281.1:ENSG00000226690	-0.02105166	0.796848149
183	AC005304.1:ENSG00000233852	0.229050602	0.004533315
184	AC005307.1:ENSG00000260725	-0.048471204	0.553175296
185	AC005307.3:ENSG00000267243	-0.069065221	0.397846049
186	AC005355.1:ENSG00000250994	-0.1364131	0.093782608
187	AC005356.1:ENSG00000262686	-0.211215274	0.00899938
188	AC005392.13:ENSG00000227606	-0.171719122	0.034399443
189	AC005498.3:ENSG00000267421	-0.031122669	0.703477231
190	AC005498.4:ENSG00000267224	-0.123377617	0.129940501
191	AC005523.3:ENSG00000268536	-0.024901041	0.760736635
192	AC005532.5:ENSG00000230825	0.298684706	0.000185694
193	AC005537.2:ENSG00000232006	-0.007309368	0.928785297
194	AC005546.2:ENSG00000266897	0.121109282	0.137203429
195	AC005550.4:ENSG00000229108	-0.293013081	0.000248861
196	AC005592.1:ENSG00000236714	-0.352206727	8.59E-06
197	AC005592.3:ENSG00000261757	-0.246142397	0.002237376
198	AC005618.6:ENSG00000272070	0.068052587	0.404817116
199	AC005624.2:ENSG00000267201	0.189767758	0.01920027
200	AC005682.8:ENSG00000235664	-0.161420521	0.046950517
201	AC005703.3:ENSG00000230971	-0.290428885	0.000283811
202	AC005754.8:ENSG00000272108	-0.382003471	1.20E-06
203	AC005757.7:ENSG00000267037	-0.083082265	0.308862435
204	AC005786.5:ENSG00000267231	0.00470149	0.954158306
205	AC005789.11:ENSG00000267473	-0.07267221	0.373603253
206	AC005863.1:ENSG00000205325	-0.089818289	0.271140933
207	AC006116.21:ENSG00000267606	-0.082933996	0.309729612
208	AC006126.4:ENSG00000267045	0.177457715	0.028729771
209	AC006129.1:ENSG00000268355	0.301622153	0.000159185
210	AC006129.2:ENSG00000268027	0.706351556	2.84E-24
211	AC006129.4:ENSG00000270164	0.627026508	5.52E-18
212	AC006262.4:ENSG00000269729	-0.232810355	0.003897332
213	AC006262.6:ENSG00000268460	-0.164009636	0.043482235
214	AC006272.1:ENSG00000269483	0.003470267	0.966154907
215	AC006272.2:ENSG00000268316	-0.077176333	0.344633547
216	AC006273.4:ENSG00000272473	-0.284377994	0.000384203
217	AC006273.5:ENSG00000267530	-0.256549469	0.001420686
218	AC006372.4:ENSG00000234210	-0.216689542	0.00733125
219	AC006946.16:ENSG00000273203	-0.107542755	0.187249661
220	AC006946.17:ENSG00000273442	-0.093429968	0.252259095
221	AC007036.6:ENSG00000227017	0.27914012	0.000496665
222	AC007064.24:ENSG00000237689	-0.151439809	0.062544034
223	AC007131.1:ENSG00000222030	-0.037791566	0.643905852
224	AC007228.5:ENSG00000268352	0.061327709	0.452915048
225	AC007228.9:ENSG00000268568	-0.112197701	0.168760736
226	AC007249.3:ENSG00000217258	0.054214057	0.507095985
227	AC007364.1:ENSG00000162947	-0.095989431	0.239440449
228	AC007381.3:ENSG00000228590	0.513448596	1.34E-11
229	AC007391.2:ENSG00000232028	0.127067692	0.118761325
230	AC007392.3:ENSG00000232046	-0.085836752	0.293041582
231	AC007551.3:ENSG00000228878	0.258590709	0.001296762
232	AC007557.3:ENSG00000227021	-0.268205782	0.000835399
233	AC007563.3:ENSG00000229352	-0.231142676	0.004168804
234	AC007682.1:ENSG00000231918	-0.143145366	0.078523524
235	AC007879.2:ENSG00000234902	0.093915488	0.249791753
236	AC007879.7:ENSG00000229647	0.099310847	0.223493587
237	AC007950.1:ENSG00000259268	-0.040002637	0.624622008
238	AC008063.3:ENSG00000233397	-0.196134896	0.01544716
239	AC008069.1:ENSG00000223536	0.025842819	0.751976444
240	AC008074.4:ENSG00000223863	-0.373651315	2.12E-06
241	AC008088.4:ENSG00000260907	-0.029617958	0.717187743
242	AC008269.2:ENSG00000229321	-0.101908773	0.211555615
243	AC008440.10:ENSG00000232324	-0.48529173	2.35E-10
244	AC008592.8:ENSG00000272021	-0.130075594	0.110213371
245	AC008746.12:ENSG00000267838	0.009508742	0.90744131
246	AC008991.1:ENSG00000267683	-0.236036266	0.003416888
247	AC009120.4:ENSG00000261404	-0.079018778	0.333203724
248	AC009229.5:ENSG00000227292	-0.341256164	1.69E-05
249	AC009404.2:ENSG00000236255	0.288822129	0.000307781
250	AC009495.2:ENSG00000235192	0.409183452	1.66E-07
251	AC009495.3:ENSG00000232411	0.000837547	0.991829221
252	AC009495.4:ENSG00000229195	0.083474217	0.306577709
253	AC009502.4:ENSG00000227308	-0.069881486	0.392279288
254	AC009518.4:ENSG00000224865	-0.199772834	0.013603764
255	AC009784.3:ENSG00000232053	0.178539844	0.027755155
256	AC010084.1:ENSG00000229308	-0.108820593	0.182032852
257	AC010090.1:ENSG00000232606	0.116115814	0.154279274
258	AC010091.1:ENSG00000233491	-0.052278658	0.522399137
259	AC010096.1:ENSG00000234597	-0.223883474	0.005558964
260	AC010525.6:ENSG00000267183	-0.131843153	0.105419425
261	AC010525.7:ENSG00000267018	-0.163625775	0.043982495
262	AC010894.3:ENSG00000226853	0.148740082	0.067423612
263	AC010967.2:ENSG00000228033	-0.059319522	0.467873962
264	AC010982.2:ENSG00000235242	-0.102416466	0.209276992
265	AC010983.1:ENSG00000235056	0.170692201	0.035507913
266	AC010987.6:ENSG00000237013	-0.05523724	0.49910096
267	AC011286.1:ENSG00000232328	-0.319403945	6.05E-05
268	AC011288.2:ENSG00000229618	-0.10157998	0.213040737
269	AC011298.2:ENSG00000219159	-0.139472213	0.086580036
270	AC011343.1:ENSG00000253311	-0.087132046	0.285791367
271	AC011524.1:ENSG00000267528	-0.414227036	1.13E-07
272	AC011525.2:ENSG00000261400	-0.150965675	0.063379431
273	AC011526.1:ENSG00000267107	-0.045841582	0.574932221
274	AC011718.2:ENSG00000223579	-0.04173088	0.609723506
275	AC011747.3:ENSG00000231435	0.295328215	0.000220988
276	AC011747.4:ENSG00000236008	0.348823921	1.06E-05
277	AC011752.1:ENSG00000231204	-0.14414955	0.076429444
278	AC011891.5:ENSG00000229233	-0.135740052	0.09542941
279	AC012065.7:ENSG00000260396	0.182895241	0.024112721
280	AC012074.2:ENSG00000235072	0.098860245	0.225611797
281	AC012309.5:ENSG00000226686	0.070337221	0.389191717
282	AC012354.6:ENSG00000225156	-0.075213123	0.35708165
283	AC012363.13:ENSG00000235840	-0.128539747	0.114515831
284	AC012368.1:ENSG00000228079	0.161998244	0.046157287
285	AC012442.6:ENSG00000228251	0.044693082	0.584558721
286	AC012531.23:ENSG00000271090	-0.304378865	0.000137555
287	AC012531.25:ENSG00000260597	-0.241976081	0.002669646
288	AC013394.2:ENSG00000272888	0.198010259	0.01447137
289	AC013448.1:ENSG00000231189	-0.131467838	0.106423401
290	AC013448.2:ENSG00000235610	0.036762836	0.652960495
291	AC015849.16:ENSG00000266999	0.459261937	2.66E-09
292	AC016700.2:ENSG00000233060	-0.078183759	0.338353519
293	AC016700.3:ENSG00000226505	0.278788259	0.000505215
294	AC016735.2:ENSG00000231826	-0.494025613	9.94E-11
295	AC016735.3:ENSG00000233978	-0.310157566	0.000100801
296	AC016768.1:ENSG00000232451	-0.139470095	0.086584864
297	AC016831.7:ENSG00000233559	-0.226410899	0.005033895
298	AC016995.3:ENSG00000231367	-0.353161885	8.09E-06
299	AC017074.2:ENSG00000227359	-0.142084612	0.080785523
300	AC017104.6:ENSG00000224376	0.03462594	0.671930298
301	AC018647.3:ENSG00000227544	-0.290424294	0.000283877
302	AC018737.3:ENSG00000224655	-0.174859142	0.031189971
303	AC018755.17:ENSG00000267808	0.117753337	0.148511845
304	AC018890.4:ENSG00000237104	-0.149823699	0.065429035
305	AC019117.1:ENSG00000236318	0.240231645	0.002872079
306	AC019117.2:ENSG00000236039	0.152695592	0.0603749
307	AC019118.3:ENSG00000236760	0.29839705	0.000188499
308	AC019186.1:ENSG00000234584	0.005361822	0.947728335
309	AC021224.1:ENSG00000262477	-0.175037927	0.031015153
310	AC022182.1:ENSG00000254777	0.268270148	0.000832898
311	AC022182.3:ENSG00000254802	0.458903182	2.75E-09
312	AC022816.2:ENSG00000230647	0.271789942	0.000706145
313	AC023137.2:ENSG00000228950	-0.134601885	0.098266332
314	AC023490.1:ENSG00000206176	0.260390854	0.001195757
315	AC023490.2:ENSG00000235704	-0.090394165	0.268067705
316	AC023672.2:ENSG00000231221	-0.221265769	0.006153848
317	AC024084.1:ENSG00000230649	0.081559498	0.317844269
318	AC024132.1:ENSG00000205830	-0.187497965	0.020717082
319	AC024560.2:ENSG00000236833	-0.102236028	0.210084809
320	AC024704.2:ENSG00000244063	0.301639556	0.000159039
321	AC026150.8:ENSG00000260693	-0.136631542	0.093253005
322	AC026188.1:ENSG00000223727	-0.046512527	0.569343062
323	AC026806.2:ENSG00000268913	0.551240036	1.85E-13
324	AC026904.1:ENSG00000233858	-0.394378989	4.97E-07
325	AC027119.1:ENSG00000229642	-0.193157468	0.0171142
326	AC027269.2:ENSG00000238284	-0.060882141	0.456210799
327	AC051649.6:ENSG00000232987	-0.258979379	0.001274316
328	AC061992.2:ENSG00000267737	0.064948633	0.426630794
329	AC062031.1:ENSG00000233842	-0.000993965	0.990303333
330	AC063976.3:ENSG00000224015	-0.10565008	0.195176113
331	AC064834.2:ENSG00000223466	0.112546939	0.16743035
332	AC064834.3:ENSG00000234919	0.095780371	0.240470109
333	AC067956.1:ENSG00000236451	0.260612049	0.001183855
334	AC067959.1:ENSG00000233005	-0.076181513	0.350906749
335	AC067961.1:ENSG00000232784	0.256528494	0.001422013
336	AC068282.3:ENSG00000236682	0.281738898	0.000437535
337	AC068286.1:ENSG00000235127	-0.081944085	0.315560003
338	AC069278.4:ENSG00000267242	0.091587669	0.261774105
339	AC069513.4:ENSG00000229178	-0.064557163	0.429429298
340	AC073043.1:ENSG00000232732	-0.042599128	0.602298166
341	AC073046.25:ENSG00000235499	0.383525695	1.08E-06
342	AC073115.6:ENSG00000237471	0.187401053	0.020784084
343	AC073115.7:ENSG00000229628	0.158372634	0.051325562
344	AC073133.2:ENSG00000228569	-0.206828098	0.010569937
345	AC073218.2:ENSG00000228262	-0.045377604	0.578812251
346	AC073236.3:ENSG00000234722	-0.151224001	0.062923151
347	AC073257.2:ENSG00000237614	-0.207172044	0.010438625
348	AC073316.2:ENSG00000231892	0.097005911	0.234477967
349	AC073636.1:ENSG00000227098	-0.166509893	0.040338953
350	AC074138.3:ENSG00000225975	-0.138679579	0.088402397
351	AC074183.4:ENSG00000232019	0.022393716	0.784204878
352	AC074363.1:ENSG00000228222	-0.213224925	0.00835158
353	AC078842.3:ENSG00000228031	-0.155199639	0.056233799
354	AC079305.11:ENSG00000236501	-0.173270855	0.032780086
355	AC079767.4:ENSG00000224137	0.699865367	1.11E-23
356	AC079776.1:ENSG00000229536	-0.158138612	0.05167501
357	AC079779.5:ENSG00000235779	-0.1777561	0.028458161
358	AC079779.6:ENSG00000233684	-0.025320102	0.75683481
359	AC079807.4:ENSG00000230773	0.087791011	0.282149359
360	AC083843.1:ENSG00000259820	-0.30010522	0.0001724
361	AC083843.2:ENSG00000254028	-0.048389726	0.553843384
362	AC083843.3:ENSG00000253433	0.09309854	0.253952991
363	AC084018.1:ENSG00000212694	0.018607065	0.8200122
364	AC084809.3:ENSG00000236377	0.208790337	0.009839883
365	AC087430.1:ENSG00000235158	-0.254940866	0.001525856
366	AC087491.2:ENSG00000214546	-0.00643706	0.937265608
367	AC090044.2:ENSG00000224239	-0.270410322	0.000753548
368	AC091493.2:ENSG00000229271	0.305809763	0.00012744
369	AC091814.2:ENSG00000225231	0.183747291	0.023450314
370	AC091814.3:ENSG00000231560	0.059110787	0.469444218
371	AC091962.3:ENSG00000251183	0.024277307	0.766555297
372	AC092162.1:ENSG00000230552	0.327913499	3.72E-05
373	AC092192.1:ENSG00000267290	-0.189286311	0.019513717
374	AC092415.1:ENSG00000235493	-0.068558756	0.401323604
375	AC092484.1:ENSG00000225107	0.313599089	8.35E-05
376	AC092580.4:ENSG00000235576	0.649250183	1.47E-19
377	AC092594.1:ENSG00000236204	-0.290041965	0.000289419
378	AC092614.2:ENSG00000227542	-0.226728746	0.004971107
379	AC092620.3:ENSG00000237772	-0.045863596	0.574748431
380	AC092661.1:ENSG00000236922	-0.137110846	0.092099277
381	AC092669.3:ENSG00000232164	-0.050034594	0.540432379
382	AC092835.2:ENSG00000233757	-0.015146891	0.853062386
383	AC093159.1:ENSG00000228541	0.255403945	0.001494875
384	AC093382.1:ENSG00000226276	0.222864457	0.005784144
385	AC093609.1:ENSG00000230587	-0.443659726	1.04E-08
386	AC093627.8:ENSG00000242611	-0.050072481	0.540125381
387	AC093627.9:ENSG00000242474	0.111202528	0.172594805
388	AC093642.4:ENSG00000226423	0.107149772	0.188875793
389	AC093702.1:ENSG00000231156	-0.252129906	0.001726817
390	AC093843.1:ENSG00000224819	0.154687336	0.057061418
391	AC093901.1:ENSG00000226856	0.055711564	0.49541727
392	AC095067.1:ENSG00000236078	-0.126049462	0.121768724
393	AC096559.1:ENSG00000224184	0.325664338	4.24E-05
394	AC096574.5:ENSG00000227107	-0.066399433	0.416351705
395	AC096669.3:ENSG00000224568	-0.063756379	0.435186627
396	AC097500.2:ENSG00000237877	-0.176295762	0.029808611
397	AC097713.4:ENSG00000231682	0.321457629	5.39E-05
398	AC097721.2:ENSG00000228043	0.167667305	0.03894978
399	AC099342.1:ENSG00000226097	0.08518782	0.296719441
400	AC099344.2:ENSG00000230952	-0.10630701	0.192397772
401	AC100848.1:ENSG00000236392	-0.203247359	0.012025793
402	AC104024.1:ENSG00000230709	0.38091433	1.29E-06
403	AC104024.2:ENSG00000230969	0.135192423	0.096786182
404	AC104088.1:ENSG00000232555	0.157683689	0.052359954
405	AC104135.2:ENSG00000236209	-0.103678091	0.203690916
406	AC104135.4:ENSG00000230836	-0.18259503	0.024349909
407	AC104653.1:ENSG00000228857	0.422570582	5.86E-08
408	AC104654.2:ENSG00000234362	0.105506784	0.195786003
409	AC104655.3:ENSG00000226508	0.290312494	0.000285487
410	AC104777.2:ENSG00000236049	-0.031993747	0.695583277
411	AC105253.1:ENSG00000227007	-0.133111712	0.102080977
412	AC105339.1:ENSG00000228141	-0.183185381	0.023885377
413	AC106053.1:ENSG00000224626	0.110753342	0.174346338
414	AC107622.1:ENSG00000231304	0.216100573	0.007496475
415	AC108004.2:ENSG00000273172	0.001101672	0.989252658
416	AC108051.3:ENSG00000224850	0.089226946	0.274321486
417	AC108488.4:ENSG00000242282	0.057170859	0.484174845
418	AC108868.5:ENSG00000231505	0.19682936	0.01507933
419	AC108868.6:ENSG00000232001	-0.191133957	0.018334413
420	AC109826.1:ENSG00000226791	0.481854582	3.28E-10
421	AC112721.2:ENSG00000222032	0.204012734	0.01170061
422	AC114765.1:ENSG00000239498	0.286304308	0.000349145
423	AC115522.3:ENSG00000268601	0.079329968	0.331297409
424	AC116035.1:ENSG00000227260	-0.280348657	0.000468305
425	AC123023.1:ENSG00000236452	0.249595743	0.001928335
426	AC123768.4:ENSG00000262728	0.059911238	0.463438348
427	AC124997.1:ENSG00000235731	-0.250550386	0.001850038
428	AC137934.1:ENSG00000260923	0.024637066	0.763197578
429	AC138035.1:ENSG00000250765	-0.043665674	0.593232613
430	AC138035.2:ENSG00000238035	0.085587163	0.294452537
431	AC139099.4:ENSG00000262898	-0.286420269	0.000347132
432	AC139099.5:ENSG00000262094	-0.088316056	0.279269911
433	AC139099.6:ENSG00000262952	-0.06017217	0.461489752
434	AC140912.1:ENSG00000261227	-0.132011778	0.104970777
435	AC141928.1:ENSG00000250986	-0.275027905	0.000605464
436	AC144450.2:ENSG00000203635	-0.292228405	0.000259026
437	AC144652.1:ENSG00000273117	0.153392554	0.059197913
438	AC144831.1:ENSG00000261888	-0.430093281	3.20E-08
439	AC144836.1:ENSG00000262213	0.047310014	0.562733355
440	AC145110.1:ENSG00000253490	0.364571786	3.88E-06
441	AC145343.2:ENSG00000265055	-0.03758893	0.645685327
442	AC156455.1:ENSG00000256546	0.162966858	0.04485243
443	AC159540.3:ENSG00000237837	-0.201385678	0.012850072
444	AC2	-0.126302879	0.121014789
445	ACAA1	0.393396089	5.34E-07
446	ACAA2	0.222328975	0.005905707
447	ACACA	-0.158448705	0.051212394
448	ACACB	-0.447916034	7.20E-09
449	ACAD10	0.289200362	0.000301976
450	ACAD11	-0.140794245	0.083607453
451	ACAD8	0.25255294	0.001695109
452	ACAD9	0.195482783	0.015799652
453	ACADL	-0.516414892	9.76E-12
454	ACADM	0.184018113	0.023243071
455	ACADS	-0.022579848	0.782455724
456	ACADSB	-0.213468052	0.008276079
457	ACADVL	0.07242346	0.375245468
458	ACAN	-0.157187284	0.053115909
459	ACAP1	0.699195446	1.27E-23
460	ACAP2	0.278841406	0.000503915
461	ACAP3	-0.140793285	0.083609581
462	ACAT1	-0.074345351	0.362672145
463	ACAT2	0.328918955	3.51E-05
464	ACBD3	0.09160799	0.261667832
465	ACBD4	0.128794213	0.113794075
466	ACBD5	0.381543872	1.24E-06
467	ACBD6	0.218732417	0.006782942
468	ACBD7	0.267236041	0.000873927
469	ACCS	-0.172481368	0.033595715
470	ACCSL	-0.083166619	0.308369789
471	ACD	0.357060113	6.32E-06
472	ACE	0.193278894	0.017043276
473	ACE2	-0.332362128	2.87E-05
474	ACER1	0.02976543	0.715839941
475	ACER2	-0.106644471	0.190981798
476	ACER3	0.254860582	0.001531287
477	ACHE	0.419529218	7.45E-08
478	ACIN1	0.247243764	0.002134253
479	ACLY	0.094673302	0.245974106
480	ACN9	0.143844861	0.07706001
481	ACO1	0.068494533	0.401765872
482	ACO2	0.304382115	0.000137531
483	ACOT1	-0.159200415	0.050105176
484	ACOT11	-0.181307642	0.025389867
485	ACOT12	-0.122303363	0.13334242
486	ACOT13	0.269136274	0.000799904
487	ACOT2	-0.143560608	0.077652061
488	ACOT4	0.144657382	0.07538773
489	ACOT6	-0.253031035	0.001659913
490	ACOT7	0.453847549	4.30E-09
491	ACOT8	0.311347235	9.45E-05
492	ACOT9	0.23015607	0.004337291
493	ACOX1	0.015361835	0.851001245
494	ACOX2	-0.299103427	0.000181679
495	ACOX3	0.142893315	0.079056333
496	ACOXL	0.575422025	8.90E-15
497	ACP1	0.318121773	6.50E-05
498	ACP2	0.618859776	1.95E-17
499	ACP5	0.518945864	7.43E-12
500	ACP6	0.070311852	0.389363208
501	ACPL2	-0.08470856	0.299455211
502	ACPP	0.480187307	3.85E-10
503	ACR	-0.357957351	5.96E-06
504	ACRBP	0.553925525	1.34E-13
505	ACRC	0.06747937	0.408795047
506	ACRV1	-0.13323353	0.101764824
507	ACSBG1	-0.075952764	0.352359279
508	ACSBG2	-0.341804298	1.63E-05
509	ACSF2	0.226352332	0.005045541
510	ACSF3	0.455834991	3.61E-09
511	ACSL1	-0.116420165	0.153194781
512	ACSL3	0.16059843	0.048098818
513	ACSL4	0.336068158	2.31E-05
514	ACSL5	0.715030299	4.33E-25
515	ACSL6	0.617887385	2.26E-17
516	ACSM1	0.102993993	0.206706403
517	ACSM2A	-0.197932977	0.014510492
518	ACSM2B	-0.302577811	0.000151351
519	ACSM3	0.594346764	6.91E-16
520	ACSM5	0.054406971	0.505583499
521	ACSS1	0.476357019	5.53E-10
522	ACSS2	-0.071368996	0.382255821
523	ACSS3	-0.316698738	7.03E-05
524	ACTA1	-0.075283	0.356633829
525	ACTA2	-0.169982753	0.036291195
526	ACTB	0.452446924	4.86E-09
527	ACTC1	-0.324774979	4.46E-05
528	ACTG1	0.26143175	0.001140689
529	ACTG1P4	-0.107280489	0.188333754
530	ACTG2	-0.257018369	0.001391299
531	ACTL10	0.237140042	0.003265188
532	ACTL6A	0.291159081	0.0002735
533	ACTL7B	-0.159576033	0.049559404
534	ACTL8	-0.109212297	0.180455281
535	ACTN1	-0.145917463	0.072852432
536	ACTN1-AS1	-0.224374527	0.005453274
537	ACTN2	-0.049576103	0.544154351
538	ACTN3	-0.175784839	0.030293794
539	ACTN4	-0.085264223	0.296284839
540	ACTR10	0.171445608	0.034691778
541	ACTR1A	0.253634576	0.001616432
542	ACTR1B	0.168889609	0.037526619
543	ACTR2	0.568140354	2.28E-14
544	ACTR3	0.567348901	2.52E-14
545	ACTR3B	-0.113384536	0.164271412
546	ACTR3BP2	-0.01090132	0.893960091
547	ACTR3BP5	-0.110024472	0.177216362
548	ACTR3C	0.528551085	2.58E-12
549	ACTR5	0.436855791	1.84E-08
550	ACTR6	0.3301657	3.27E-05
551	ACTR8	0.446967067	7.81E-09
552	ACTRT1	-0.177392926	0.028789037
553	ACTRT3	-0.07260973	0.374015324
554	ACVR1	-0.186330979	0.021536418
555	ACVR1B	0.061751455	0.449793094
556	ACVR1C	-0.297058857	0.000202078
557	ACVR2A	-9.88E-05	0.999035644
558	ACVR2B	-0.115326306	0.157119441
559	ACVR2B-AS1	-0.25725407	0.001376738
560	ACVRL1	0.218000953	0.006974925
561	ACY1	0.263529916	0.001036676
562	ACY3	0.561534381	5.24E-14
563	ACYP1	0.153922077	0.058316347
564	ACYP2	0.134368377	0.098856521
565	AD_1	-0.215299751	0.007726431
566	ADA	0.551646597	1.76E-13
567	ADAD2	-0.066567325	0.415171584
568	ADAL	0.020053836	0.806282995
569	ADAM10	0.453867521	4.29E-09
570	ADAM11	-0.437807673	1.70E-08
571	ADAM12	0.094056749	0.24907703
572	ADAM15	-0.018635036	0.819746237
573	ADAM17	0.413771976	1.17E-07
574	ADAM19	0.584176346	2.78E-15
575	ADAM1A	-0.059257159	0.468342804
576	ADAM20	-0.138567787	0.088661866
577	ADAM20P1	-0.234388514	0.003655183
578	ADAM20P1:ENSG00000259158	-0.223983553	0.005537276
579	ADAM21	-0.169536473	0.036791353
580	ADAM21P1	-0.155707689	0.055422847
581	ADAM22	-0.395649358	4.53E-07
582	ADAM23	-0.205066802	0.01126542
583	ADAM28	0.800273507	3.90E-35
584	ADAM29	0.144023722	0.076689344
585	ADAM30	-0.138336547	0.089200503
586	ADAM32	-0.307942286	0.000113646
587	ADAM33	-0.437130974	1.79E-08
588	ADAM5	-0.12110229	0.137226288
589	ADAM7	-0.205828926	0.01095969
590	ADAM8	0.603066159	2.01E-16
591	ADAM9	0.178242818	0.028019818
592	ADAMDEC1	0.749623497	1.13E-28
593	ADAMTS1	-0.118834636	0.14479379
594	ADAMTS10	-0.202965423	0.012147562
595	ADAMTS12	-0.097472958	0.232222181
596	ADAMTS13	-0.229076987	0.004528545
597	ADAMTS14	0.317652535	6.67E-05
598	ADAMTS15	-0.037104612	0.649946564
599	ADAMTS16	0.223025189	0.005748093
600	ADAMTS17	-0.239411852	0.002971919
601	ADAMTS18	0.010766343	0.895265511
602	ADAMTS19	-0.387168862	8.33E-07
603	ADAMTS2	-0.019036549	0.815930686
604	ADAMTS20	-0.064387336	0.430646613
605	ADAMTS3	-0.138335908	0.089201994
606	ADAMTS4	0.175886235	0.030196976
607	ADAMTS5	-0.138903554	0.087884375
608	ADAMTS6	-0.227834293	0.004758142
609	ADAMTS7	-0.306184749	0.000124906
610	ADAMTS8	-0.006839133	0.933355841
611	ADAMTS9	-0.024615457	0.763399136
612	ADAMTS9-AS2	-0.397137148	4.07E-07
613	ADAMTSL1	0.103593366	0.204062655
614	ADAMTSL2	-0.232498375	0.003946876
615	ADAMTSL3	-0.072141943	0.377109327
616	ADAMTSL4	-0.124466149	0.126561797
617	ADAMTSL5	0.002323322	0.977337209
618	ADAP1	0.61101679	6.31E-17
619	ADAP2	0.456101954	3.52E-09
620	ADAR	0.540756495	6.41E-13
621	ADARB1	-0.123790214	0.12865177
622	ADARB2	-0.081855064	0.316087795
623	ADAT1	0.369046756	2.89E-06
624	ADAT2	0.076656713	0.347901317
625	ADAT3	0.170666799	0.035535711
626	ADC	-0.091009548	0.264809924
627	ADCK1	0.305139924	0.000132085
628	ADCK2	0.570193224	1.75E-14
629	ADCK3	-0.131161472	0.107248489
630	ADCK4	0.051125258	0.531629464
631	ADCK5	0.234782026	0.003596953
632	ADCY1	0.235378806	0.003510237
633	ADCY10	-0.217161835	0.007201102
634	ADCY10P1	0.151383143	0.062643399
635	ADCY2	-0.588228072	1.61E-15
636	ADCY3	-0.168505141	0.037969466
637	ADCY4	-0.243263779	0.002528595
638	ADCY5	-0.6023914	2.21E-16
639	ADCY6	-0.45159088	5.24E-09
640	ADCY7	0.453169867	4.56E-09
641	ADCY8	-0.009015659	0.912221272
642	ADCY9	-0.376809928	1.71E-06
643	ADCYAP1	0.245750683	0.002275129
644	ADCYAP1R1	-0.402184054	2.81E-07
645	ADD1	0.01362026	0.867729354
646	ADD2	0.291787344	0.000264908
647	ADD3	0.084098521	0.302961532
648	ADGB	0.208754104	0.00985295
649	ADH1A	-0.401154414	3.03E-07
650	ADH1B	-0.361642426	4.70E-06
651	ADH1C	-0.370373864	2.64E-06
652	ADH4	-0.252086179	0.001730125
653	ADH5	-0.034507573	0.672987283
654	ADH6	-0.177096689	0.029061351
655	ADHFE1	-0.295763333	0.000216084
656	ADI1	0.199110476	0.013924315
657	ADIG	-0.121066369	0.13734376
658	ADIPOQ	-0.354795223	7.30E-06
659	ADIPOQ-AS1	-0.311691938	9.27E-05
660	ADIPOR1	0.201009671	0.013022434
661	ADIPOR2	-0.01647643	0.840329623
662	ADIRF	-0.537103896	9.78E-13
663	ADK	0.101044569	0.215475054
664	ADM	0.134323377	0.09897058
665	ADM2	0.58767054	1.73E-15
666	ADM5	-0.026025958	0.750276563
667	ADNP	0.154287123	0.057714914
668	ADNP2	0.062636377	0.443312519
669	ADO	0.362739739	4.38E-06
670	ADORA1	0.119997181	0.14087559
671	ADORA2A	0.538204013	8.62E-13
672	ADORA2A-AS1	-0.279270687	0.000493526
673	ADORA2B	0.214592719	0.007934634
674	ADORA3	0.238925864	0.003032577
675	ADPGK	0.701134013	8.52E-24
676	ADPGK-AS1	0.500526972	5.16E-11
677	ADPRH	0.479311849	4.18E-10
678	ADPRHL1	-0.174386707	0.031655954
679	ADPRHL2	0.487296301	1.93E-10
680	ADPRM	0.285079941	0.000371067
681	ADRA1A	-0.460105165	2.47E-09
682	ADRA1B	-0.237521764	0.003214156
683	ADRA1D	-0.075653424	0.354265734
684	ADRA2A	-0.449501812	6.28E-09
685	ADRA2B	-0.374864452	1.95E-06
686	ADRA2C	-0.309197598	0.000106191
687	ADRB1	0.055395762	0.497868248
688	ADRB2	0.312292671	8.97E-05
689	ADRB3	0.18523381	0.022332056
690	ADRBK1	0.604946983	1.53E-16
691	ADRBK2	0.449522732	6.27E-09
692	ADRM1	0.383716677	1.06E-06
693	ADSL	0.39267706	5.62E-07
694	ADSS	0.27149715	0.00071597
695	ADSSL1	-0.259994948	0.001217333
696	ADTRP	0.165123798	0.0420571
697	AEBP1	-0.131907696	0.105247522
698	AEBP2	-0.084556614	0.300326031
699	AEN	0.50095014	4.94E-11
700	AES	0.169080276	0.037308619
701	AF007147	0.035428758	0.664778373
702	AF015720.3:ENSG00000230794	-0.153379024	0.059220581
703	AF020763	-0.282153651	0.000428724
704	AF035281	-0.283171293	0.000407794
705	AF038458.5:ENSG00000267388	-0.052874453	0.5176633
706	AF047486	-0.312440259	8.90E-05
707	AF055024	-0.205396042	0.011132436
708	AF063596	0.173854601	0.032187859
709	AF064858.10:ENSG00000237609	0.144431259	0.07585015
710	AF064858.11:ENSG00000237721	0.066465488	0.415887171
711	AF064858.6:ENSG00000205622	-0.06500616	0.426220445
712	AF064858.7:ENSG00000232837	0.103733423	0.203448408
713	AF064858.8:ENSG00000235888	0.15503821	0.056493511
714	AF064860.7:ENSG00000231713	-0.070827177	0.385888684
715	AF067845.1:ENSG00000260721	-0.161897638	0.046294611
716	AF070569	0.119864021	0.141320251
717	AF070581	0.192688695	0.017390418
718	AF072097	-0.103515954	0.204402732
719	AF075036	-0.047243642	0.563282056
720	AF075112	-0.082207304	0.314002771
721	AF079515	0.033324137	0.683589942
722	AF085995	0.147387049	0.069983335
723	AF086102	-0.113080143	0.165414226
724	AF086125	-0.007381639	0.928083053
725	AF086126	0.084461015	0.300874782
726	AF086132	0.520332875	6.39E-12
727	AF086154	-0.113737995	0.162951784
728	AF086165	0.080770642	0.32256319
729	AF086184	0.092316433	0.257981279
730	AF086285	0.131137616	0.107312946
731	AF086288	-0.139697683	0.086067174
732	AF086303	0.013562092	0.868289116
733	AF086351	0.066727623	0.41404667
734	AF086476	0.098910318	0.225375713
735	AF088041	0.101275624	0.21442211
736	AF090102	-0.0674859	0.408749596
737	AF090939	-0.163972266	0.043530727
738	AF116693	-0.366257508	3.48E-06
739	AF119915	0.10870601	0.182496238
740	AF127577.12:ENSG00000236471	-0.036820057	0.652455506
741	AF127936.3:ENSG00000232884	0.42187984	6.19E-08
742	AF127936.5:ENSG00000226751	0.609012064	8.47E-17
743	AF127936.7:ENSG00000235609	-0.037907743	0.64288653
744	AF131215.8:ENSG00000270076	0.38217918	1.18E-06
745	AF131217.1:ENSG00000232855	0.24028839	0.002865281
746	AF131837	-0.322526331	5.07E-05
747	AF143871	-0.288336409	0.000315389
748	AF157115	-0.017032815	0.835013273
749	AF161365	-0.157884721	0.052056354
750	AF161442	-0.167232871	0.039466416
751	AF186192.1:ENSG00000254533	-0.178069246	0.028175473
752	AF186192.6:ENSG00000263612	-0.124915713	0.125186311
753	AF198444	-0.176204396	0.029894886
754	AF216583	-0.249082275	0.001971683
755	AF258550	-0.020216408	0.804743862
756	AF258560	0.130132532	0.11005633
757	AF268386	-0.423698111	5.36E-08
758	AF279775	-0.043492071	0.594704006
759	AF279780	0.137393035	0.091425353
760	AF279782	0.015992768	0.844956966
761	AF289551	0.389116394	7.25E-07
762	AF339817	-0.407246481	1.92E-07
763	AF401214	0.02741201	0.737450737
764	AF420437	0.021222313	0.795237455
765	AF520792	-0.170278547	0.035962863
766	AF520793	-0.070317957	0.389321936
767	AF532840	0.139500407	0.086515771
768	AFAP1	0.044097344	0.58958113
769	AFAP1-AS1	0.304370949	0.000137613
770	AFAP1L1	-0.198704308	0.014124131
771	AFAP1L2	-0.337955218	2.06E-05
772	AFF1	-0.120455334	0.139353809
773	AFF2	0.136757151	0.092949547
774	AFF3	-0.198080335	0.014435975
775	AFF4	-0.000987986	0.990361663
776	AFG3L1P	0.178403243	0.027876606
777	AFG3L2	0.266333542	0.000911241
778	AFMID	0.284172335	0.000388132
779	AFP	-0.016958298	0.835724864
780	AFTPH	0.590982855	1.10E-15
781	AGA	0.582721751	3.39E-15
782	AGAP1	-0.539083215	7.78E-13
783	AGAP11	-0.596796934	4.90E-16
784	AGAP2	0.69613629	2.39E-23
785	AGAP2-AS1	-0.021778351	0.789995339
786	AGAP3	0.186360308	0.021515489
787	AGAP4	0.041721682	0.609802384
788	AGAP5	0.454163804	4.18E-09
789	AGAP6	0.058457441	0.474377748
790	AGAP7	0.077382475	0.343342561
791	AGAP8	-0.062375669	0.445216259
792	AGAP9	0.071009119	0.384666455
793	AGBL1	-0.38816586	7.76E-07
794	AGBL2	0.32164195	5.33E-05
795	AGBL3	-0.324574921	4.51E-05
796	AGBL4	-0.384668691	9.93E-07
797	AGBL5	-0.142119051	0.080711269
798	AGER	0.218578478	0.00682295
799	AGFG1	0.097316164	0.232977773
800	AGFG2	0.349496167	1.02E-05
801	AGGF1	0.377960193	1.58E-06
802	AGK	0.340408279	1.78E-05
803	AGL	0.006214366	0.939431728
804	AGMAT	0.507638582	2.47E-11
805	AGMO	-0.474967774	6.31E-10
806	AGO1	0.114027891	0.161875388
807	AGO2	-0.185659833	0.02202016
808	AGO3	0.061577237	0.451075183
809	AGO4	0.342235838	1.59E-05
810	AGPAT1	0.146552051	0.071602036
811	AGPAT2	-0.097595392	0.231633371
812	AGPAT3	0.544854971	3.96E-13
813	AGPAT4	-0.186559032	0.021374142
814	AGPAT4-IT1	-0.084208035	0.302330098
815	AGPAT5	0.442807183	1.11E-08
816	AGPAT6	0.23743975	0.00322506
817	AGPAT9	0.129321188	0.112310665
818	AGPHD1	-0.349819713	9.98E-06
819	AGPS	0.154772402	0.056923305
820	AGR2	0.188118746	0.020292299
821	AGRN	-0.001259622	0.987711889
822	AGRP	0.071614939	0.380613657
823	AGT	-0.168813103	0.037614393
824	AGTPBP1	0.564899734	3.44E-14
825	AGTR1	-0.323922287	4.68E-05
826	AGTR2	-0.097257256	0.233262097
827	AGTRAP	0.465247234	1.55E-09
828	AGXT	-0.091471137	0.262384115
829	AGXT2	-0.10927193	0.180215999
830	AGXT2L1	-0.312895169	8.68E-05
831	AGXT2L2	0.187413754	0.020775292
832	AHCTF1	-0.207278552	0.010398254
833	AHCTF1P1	-0.185648586	0.022028346
834	AHCY	0.473867951	6.99E-10
835	AHCYL1	-0.04008281	0.623927433
836	AHCYL2	0.103316128	0.205282467
837	AHDC1	-0.434404354	2.25E-08
838	AHI1	-0.221339866	0.006136258
839	AHNAK	-0.213770909	0.008182875
840	AHNAK2	-0.491872598	1.23E-10
841	AHR	0.418436168	8.12E-08
842	AHRR	-0.127714046	0.116882398
843	AHSA1	0.347199846	1.17E-05
844	AHSA2	0.054072737	0.50820545
845	AHSP	-0.222589304	0.005846326
846	AICDA	0.218415127	0.006865634
847	AIDA	0.060410718	0.459712282
848	AIF1	0.639516322	7.47E-19
849	AIF1L	-0.315607832	7.47E-05
850	AIFM1	0.419123178	7.69E-08
851	AIFM2	-0.165928003	0.041052927
852	AIFM3	0.286858063	0.000339629
853	AIG1	-0.264407773	0.000995796
854	AIM1	0.52189927	5.38E-12
855	AIM1L	0.265857783	0.000931494
856	AIM2	0.754275027	3.35E-29
857	AIMP1	0.126099793	0.121618697
858	AIMP2	0.300289958	0.000170738
859	AIP	0.375697826	1.85E-06
860	AIPL1	-0.032074879	0.694849683
861	AIRE	-0.025643284	0.753829875
862	AJ004954	0.682026987	3.92E-22
863	AJ006998.2:ENSG00000229425	-0.200049636	0.013471728
864	AJ011981	0.154378343	0.057565424
865	AJ276246	-0.084666172	0.299697972
866	AJ297365	0.124552047	0.126298087
867	AJ420422	-0.153375267	0.059226878
868	AJ420489	0.115070358	0.158048553
869	AJ420595	0.073600407	0.367514364
870	AJ515158	0.023499981	0.773825029
871	AJ606316	0.256165301	0.001445183
872	AJ606328	0.087904049	0.281527758
873	AJ606331	0.13608835	0.094574362
874	AJAP1	-0.285548842	0.000362525
875	AJUBA	-0.187472647	0.020734568
876	AK000154	-0.116209303	0.153945531
877	AK000451	-0.069376134	0.395720152
878	AK000470	0.160740745	0.047898376
879	AK000798	-0.469819906	1.02E-09
880	AK000807	-0.199443502	0.01376233
881	AK000840	-0.384830664	9.82E-07
882	AK000953	0.224528943	0.005420412
883	AK001057	0.295780952	0.000215888
884	AK001351	0.201268564	0.012903542
885	AK001394	-0.361381277	4.78E-06
886	AK001533	0.106989796	0.189540703
887	AK001558	0.152942944	0.059955008
888	AK001582	-0.096530052	0.236792073
889	AK001928	0.168691516	0.037754245
890	AK001975	-0.025665623	0.753622301
891	AK002090	-0.229432043	0.004464797
892	AK021537	0.172343847	0.033739534
893	AK021551	0.396927552	4.13E-07
894	AK021563	0.175040818	0.031012333
895	AK021570	0.151717416	0.062059107
896	AK021664	-0.1093837	0.179768137
897	AK021739	-0.113583448	0.163527804
898	AK021804	-0.194700304	0.016231837
899	AK021876	-0.101766977	0.212195184
900	AK021888	-0.137265404	0.091729674
901	AK021933	0.079994838	0.327247934
902	AK021977	-0.348323242	1.10E-05
903	AK022030	-0.072924162	0.371944391
904	AK022382	-0.204404971	0.011536973
905	AK022787	0.168716819	0.037725104
906	AK022793	0.099360118	0.223262827
907	AK022898	-0.110704847	0.17453622
908	AK022914	0.08259305	0.311729717
909	AK022915	0.218431117	0.006861445
910	AK022993	0.254741713	0.001539359
911	AK022997	0.024609741	0.763452459
912	AK023040	-0.043001315	0.598872356
913	AK023159	0.222920972	0.005771445
914	AK023178	0.053379177	0.513668637
915	AK023304	-0.163931256	0.043583994
916	AK023417	-0.065756285	0.420890516
917	AK023457	-0.075546996	0.354945113
918	AK023507	-0.386166905	8.94E-07
919	AK023515	-0.226691877	0.004978354
920	AK023548	-0.145328109	0.074029487
921	AK023566	0.151126785	0.063094547
922	AK023614	0.139366135	0.086822166
923	AK023627	0.128451771	0.114766192
924	AK023809	-0.227439112	0.004833309
925	AK024092	0.086034543	0.291926641
926	AK024119	0.390686224	6.49E-07
927	AK024134	0.199387862	0.013789278
928	AK024141	0.032751915	0.688738997
929	AK024242	-0.092109795	0.259052868
930	AK024243	0.156151451	0.054722428
931	AK024248	-0.145067193	0.074555477
932	AK024736	0.103444496	0.204717012
933	AK024936	0.082789713	0.310574999
934	AK024998	-0.075099602	0.357809919
935	AK025061	0.115001015	0.158300981
936	AK025117	0.30147875	0.000160393
937	AK025127	-0.281668497	0.000439047
938	AK025140	0.223206183	0.005707739
939	AK025288	0.096750038	0.2357203
940	AK025321	-0.248110155	0.002056185
941	AK025511	0.125267002	0.12411956
942	AK025664	0.190255215	0.018887358
943	AK025726	-0.028493743	0.727490768
944	AK025793	0.072084612	0.377489596
945	AK025975	0.075308177	0.356472557
946	AK026244	0.159155345	0.050170997
947	AK026379	0.791921065	6.01E-34
948	AK026502	0.388455071	7.60E-07
949	AK026512	0.010040621	0.902288992
950	AK026714	0.101776767	0.212150978
951	AK026736	-0.086023401	0.29198937
952	AK026758	-0.122335744	0.13323889
953	AK026777	-0.349546908	1.01E-05
954	AK026905	-0.104916729	0.198311932
955	AK027091	-0.130762026	0.108331779
956	AK027145	-0.054510951	0.504769255
957	AK027190	-0.166917316	0.039845278
958	AK027541	0.663914833	1.14E-20
959	AK054623	-0.067050051	0.411789395
960	AK054635	0.087796067	0.282121535
961	AK054708	0.162698595	0.045210695
962	AK054710	0.352190602	8.60E-06
963	AK054749	-0.111426611	0.171725912
964	AK054753	-0.134719269	0.0979707
965	AK054837	0.088887951	0.276156108
966	AK054845	0.184430127	0.022930802
967	AK054905	0.019546889	0.811087205
968	AK054921	-0.48223149	3.16E-10
969	AK054970	-0.029591847	0.717426467
970	AK054972	0.246116536	0.002239851
971	AK054988	-0.164508364	0.042839392
972	AK054990	0.0891014	0.274999966
973	AK055017	-0.099061641	0.224663316
974	AK055145	-0.239032867	0.003019126
975	AK055197	-0.34151407	1.66E-05
976	AK055250	-0.317657067	6.67E-05
977	AK055254	0.222327933	0.005905946
978	AK055257	0.117729096	0.148596016
979	AK055260	0.069540531	0.394598825
980	AK055272	-0.091494215	0.262263233
981	AK055323	-0.278507112	0.000512144
982	AK055332	-0.149861301	0.065360694
983	AK055351	-0.114525777	0.160039129
984	AK055364	-0.056523773	0.489143034
985	AK055370	-0.354505377	7.43E-06
986	AK055384	0.292353659	0.000257378
987	AK055386	-0.463527013	1.81E-09
988	AK055408	-0.386286711	8.86E-07
989	AK055458	0.073555399	0.367808194
990	AK055459	-0.075639107	0.354357078
991	AK055533	-0.012948793	0.874195018
992	AK055550	0.29522843	0.000222127
993	AK055570	-0.272048755	0.000697564
994	AK055601	0.239828567	0.002920784
995	AK055623	0.265817452	0.00093323
996	AK055694	-0.038497928	0.637718671
997	AK055712	-0.094890491	0.244887476
998	AK055772	-0.288290626	0.000316115
999	AK055785	0.142819564	0.079212785
1000	AK055803	0.344546033	1.38E-05
1001	AK055811	0.008814404	0.914173154
1002	AK055849	0.039295238	0.630764771
1003	AK055853	-0.441890255	1.20E-08
1004	AK055856	-0.200669368	0.013180171
1005	AK055876	0.029648339	0.716910009
1006	AK055890	-0.270504391	0.000750225
1007	AK055910	0.146787602	0.071142359
1008	AK055918	-0.145818857	0.073048305
1009	AK055932	-0.210125883	0.009368784
1010	AK055957	-0.030300807	0.710954318
1011	AK055967	-0.07064372	0.387123469
1012	AK055974	0.097506675	0.232059924
1013	AK055980	-0.148205071	0.068426499
1014	AK055981	-0.033796034	0.679354565
1015	AK056073	0.069223521	0.396762806
1016	AK056077	-0.026884531	0.742323458
1017	AK056081	-0.067873946	0.406054363
1018	AK056098	0.209529777	0.009576535
1019	AK056135	-0.088367203	0.27899047
1020	AK056182	0.06602821	0.418967994
1021	AK056196	-0.294756459	0.000227588
1022	AK056211	-0.16841612	0.038072629
1023	AK056228	-0.077393321	0.343274721
1024	AK056246	0.112021184	0.169436142
1025	AK056252	0.070740797	0.38646978
1026	AK056253	-0.051608928	0.527748849
1027	AK056267	-0.063581656	0.436448655
1028	AK056351	-0.088491167	0.278313981
1029	AK056368	0.245233918	0.002325818
1030	AK056396	-0.089428624	0.273233934
1031	AK056431	-0.117214784	0.150390378
1032	AK056432	-0.174337159	0.031705167
1033	AK056485	0.004185199	0.959187765
1034	AK056486	-0.15749193	0.052650914
1035	AK056490	-0.270414405	0.000753403
1036	AK056524	0.011264901	0.890445178
1037	AK056584	-0.42971565	3.30E-08
1038	AK056618	-0.060473095	0.459248126
1039	AK056623	-0.280405238	0.000467015
1040	AK056625	-0.183838586	0.023380275
1041	AK056657	0.055342102	0.49828534
1042	AK056686	0.479467135	4.12E-10
1043	AK056689	0.270252157	0.000759165
1044	AK056780	-0.081159685	0.320230319
1045	AK056817	0.596157647	5.36E-16
1046	AK056897	0.227699301	0.0047837
1047	AK056973	0.378912821	1.48E-06
1048	AK056982	0.2077741	0.010212226
1049	AK057177	0.028271586	0.729532609
1050	AK057187	-0.157676741	0.052370472
1051	AK057188	0.203794117	0.011792696
1052	AK057218	-0.017758495	0.82809051
1053	AK057259	-0.116807682	0.151822259
1054	AK057316	-0.110212555	0.176472445
1055	AK057321	-0.273346048	0.000655979
1056	AK057332	-0.147875522	0.069050263
1057	AK057379	-0.163769839	0.043794185
1058	AK057448	-0.022642858	0.781863841
1059	AK057451	-0.087348807	0.284589903
1060	AK057455	-0.147787629	0.069217405
1061	AK057513	0.003011892	0.970623226
1062	AK057519	-0.077869627	0.340303883
1063	AK057596	-0.004468944	0.956423451
1064	AK057604	-0.113216957	0.164899841
1065	AK057657	0.013212545	0.871654287
1066	AK057681	0.156212216	0.05462709
1067	AK057689	-0.342263571	1.59E-05
1068	AK057719	-0.290452346	0.000283474
1069	AK057766	0.114032707	0.161857552
1070	AK057873	0.386043942	9.02E-07
1071	AK057887	-0.039058129	0.632829419
1072	AK057897	-0.121079033	0.137302334
1073	AK057978	-0.073598137	0.367529181
1074	AK058136	-0.171726848	0.034391215
1075	AK074396	-0.38918028	7.22E-07
1076	AK074469	0.033091567	0.685680951
1077	AK074476	-0.031172051	0.703028864
1078	AK074615	-0.118432755	0.14616733
1079	AK075019	-0.122936599	0.131328945
1080	AK090553	0.277690716	0.000532765
1081	AK090593	-0.008970216	0.912661961
1082	AK090674	-0.079287364	0.331557982
1083	AK090681	0.187517206	0.020703801
1084	AK090688	-0.283211255	0.000406992
1085	AK090700	-0.361835062	4.64E-06
1086	AK090736	0.101494239	0.213429242
1087	AK090844	0.257175486	0.001381577
1088	AK090854	-0.214034825	0.008102415
1089	AK090895	0.03621308	0.657820263
1090	AK090904	-0.372659	2.27E-06
1091	AK090973	0.309838631	0.000102563
1092	AK091028	-0.085111472	0.297154144
1093	AK091070	-0.396352478	4.31E-07
1094	AK091102	-0.14288729	0.079069106
1095	AK091275	0.415695858	1.01E-07
1096	AK091365	-0.079972087	0.327385968
1097	AK091593	-0.114444106	0.160339265
1098	AK091624	0.046509819	0.569365564
1099	AK091688	-0.211934979	0.008762453
1100	AK091729	0.09851489	0.227244834
1101	AK091866	0.167137763	0.039580284
1102	AK091889	0.01260469	0.877511698
1103	AK091906	-0.233331299	0.00381585
1104	AK091996	0.411084195	1.43E-07
1105	AK092048	-0.389342608	7.14E-07
1106	AK092087	-0.200273685	0.013365678
1107	AK092098	0.002468593	0.975920575
1108	AK092150	-0.070800467	0.386068312
1109	AK092251	-0.181123013	0.025542087
1110	AK092313	-0.174959795	0.031091449
1111	AK092331	0.119519131	0.142476908
1112	AK092380	-0.10562287	0.195291816
1113	AK092451	-0.075152928	0.357467703
1114	AK092541	-0.299548321	0.000177502
1115	AK092589	0.15470672	0.057029922
1116	AK092619	-0.202417926	0.012387122
1117	AK092965	0.070101324	0.390788072
1118	AK093002	0.319535142	6.00E-05
1119	AK093026	0.016247057	0.842523433
1120	AK093107	0.106388337	0.192055831
1121	AK093114	-0.020004289	0.80675223
1122	AK093203	-0.312133479	9.05E-05
1123	AK093205	-0.101215264	0.214696825
1124	AK093256	0.271640331	0.00071115
1125	AK093299	-0.277483297	0.000538124
1126	AK093356	-0.24277162	0.002581688
1127	AK093381	-0.213944567	0.008129853
1128	AK093416	-0.156672827	0.053908859
1129	AK093443	0.025674402	0.753540733
1130	AK093513	-0.355737932	6.87E-06
1131	AK093519	0.037783006	0.643980977
1132	AK093525	0.060590047	0.458378566
1133	AK093534	0.253591791	0.00161948
1134	AK093551	0.102537243	0.208737527
1135	AK093552	0.167728858	0.038877042
1136	AK093555	0.170765352	0.035427967
1137	AK093600	-0.176137126	0.029958543
1138	AK093758	-0.190582058	0.018680029
1139	AK093892	0.155585304	0.05561731
1140	AK093898	0.022276988	0.785302367
1141	AK093940	0.0730138	0.3713553
1142	AK094117	0.075300995	0.356518557
1143	AK094156	0.312157639	9.04E-05
1144	AK094188	-0.072721567	0.373277928
1145	AK094196	-0.408452708	1.75E-07
1146	AK094280	-0.114350717	0.160682983
1147	AK094325	-0.266018747	0.000924596
1148	AK094342	-0.232092083	0.004012244
1149	AK094343	-0.310522596	9.88E-05
1150	AK094352	-0.18268332	0.024279946
1151	AK094413	-0.368145791	3.07E-06
1152	AK094462	0.111341648	0.172054978
1153	AK094480	0.146294754	0.072106902
1154	AK094525	-0.120180592	0.140264868
1155	AK094577	-0.108197778	0.184562021
1156	AK094599	-0.19647489	0.015266113
1157	AK094611	-0.127112588	0.11863006
1158	AK094621	0.149044475	0.066858387
1159	AK094639	-0.174750526	0.031296585
1160	AK094644	-0.192502752	0.01750105
1161	AK094674	-0.031030032	0.704318614
1162	AK094692	0.164239025	0.043185565
1163	AK094733	0.058593546	0.473347676
1164	AK094786	-0.223033409	0.005746255
1165	AK094818	0.318475659	6.37E-05
1166	AK094859	-0.145377791	0.07392967
1167	AK094909	0.279041394	0.00049905
1168	AK094916	0.017050041	0.834848794
1169	AK094929	-0.293955658	0.000237141
1170	AK094934	0.086767622	0.287818933
1171	AK094945	0.037031654	0.650589464
1172	AK094963	-0.552048017	1.68E-13
1173	AK094985	0.119116516	0.143836245
1174	AK094990	-0.249535784	0.001933352
1175	AK095045	-0.232598647	0.003930891
1176	AK095057	0.024633031	0.763235215
1177	AK095112	-0.185977288	0.021790194
1178	AK095132	-0.183554413	0.023598878
1179	AK095151	0.228351864	0.004661279
1180	AK095179	-0.266891303	0.000888011
1181	AK095187	-0.144242793	0.076237311
1182	AK095210	0.402465237	2.75E-07
1183	AK095221	-0.172698799	0.033369389
1184	AK095242	0.083754739	0.304949346
1185	AK095267	0.274137205	0.000631752
1186	AK095310	0.055642307	0.495954233
1187	AK095335	-0.015978534	0.845093229
1188	AK095365	-0.313995517	8.17E-05
1189	AK095366	0.22243817	0.005880734
1190	AK095439	-0.344983348	1.35E-05
1191	AK095498	-0.062636014	0.443315168
1192	AK095546	0.207964401	0.01014157
1193	AK095583	-0.372003337	2.37E-06
1194	AK095618	-0.168058311	0.038489664
1195	AK095621	0.121615797	0.135555337
1196	AK095633	0.305688883	0.000128267
1197	AK095700	-0.090323701	0.268442468
1198	AK095721	0.046996519	0.565327275
1199	AK095988	-0.302036386	0.000155745
1200	AK096023	-0.012318335	0.880273388
1201	AK096066	-0.18699449	0.02106721
1202	AK096159	-0.283941608	0.000392585
1203	AK096219	-0.149155261	0.066653631
1204	AK096230	-0.131736172	0.10570484
1205	AK096233	0.050373589	0.537688586
1206	AK096249	-0.249348263	0.001949119
1207	AK096291	0.218384287	0.006873719
1208	AK096314	-0.037140809	0.649627693
1209	AK096329	0.060096924	0.462051212
1210	AK096335	-0.134500203	0.098522988
1211	AK096395	0.136914643	0.092570175
1212	AK096475	-0.073372686	0.369002499
1213	AK096499	-0.175589795	0.030480775
1214	AK096549	-0.107309279	0.188214527
1215	AK096592	0.033706492	0.680157459
1216	AK096622	-0.256291127	0.001437117
1217	AK096718	-0.370754426	2.58E-06
1218	AK096766	0.483105397	2.91E-10
1219	AK096792	0.197500255	0.014731258
1220	AK096834	-0.20210541	0.012525713
1221	AK096898	-0.186596148	0.021347832
1222	AK096932	-0.06841853	0.402289632
1223	AK096982	0.088066105	0.280638211
1224	AK096995	-0.270296083	0.000757601
1225	AK097012	0.056085104	0.492526437
1226	AK097119	-0.229248115	0.004497719
1227	AK097143	-0.097483105	0.232173342
1228	AK097161	-0.059849595	0.463899352
1229	AK097184	0.404224057	2.41E-07
1230	AK097190	0.490266046	1.44E-10
1231	AK097193	-0.138091589	0.089773934
1232	AK097242	-0.145044246	0.074601882
1233	AK097288	-0.357573717	6.11E-06
1234	AK097289	-0.108656128	0.182698234
1235	AK097351	-0.033986977	0.677643647
1236	AK097370	-0.379334023	1.44E-06
1237	AK097428	-0.256086692	0.001450243
1238	AK097432	-0.069741466	0.393230862
1239	AK097447	-0.13244696	0.103819851
1240	AK097453	-0.071222769	0.383234213
1241	AK097472	0.277265856	0.000543796
1242	AK097500	-0.310851256	9.71E-05
1243	AK097527	0.033717863	0.680055475
1244	AK097571	0.465040697	1.58E-09
1245	AK097585	-0.184085448	0.023191789
1246	AK097590	-0.135114774	0.096979791
1247	AK097618	0.055554014	0.496639239
1248	AK097622	-0.151337104	0.062724226
1249	AK097625	-0.29864363	0.000186092
1250	AK097658	-0.240163318	0.002880283
1251	AK097701	0.056707976	0.487726004
1252	AK097702	-0.401151537	3.03E-07
1253	AK097706	0.007659101	0.925387498
1254	AK097722	-0.028386154	0.728479378
1255	AK097787	-0.121059613	0.137365861
1256	AK097791	0.107563626	0.187163588
1257	AK097794	-0.14047457	0.084318632
1258	AK097803	0.224696685	0.005384915
1259	AK097814	0.063504357	0.437007657
1260	AK097816	-0.129330266	0.112285242
1261	AK097836	0.048424279	0.553560019
1262	AK097866	0.446690482	8.00E-09
1263	AK097878	-0.204176195	0.011632169
1264	AK097902	0.144220615	0.076282974
1265	AK097910	0.020624273	0.800885764
1266	AK097921	0.061539268	0.451354871
1267	AK097934	0.231968126	0.004032381
1268	AK097952	0.449060901	6.52E-09
1269	AK097957	0.380198948	1.36E-06
1270	AK098012	0.494629878	9.36E-11
1271	AK098067	0.462050019	2.07E-09
1272	AK098095	0.009887284	0.903773959
1273	AK098198	-0.302175655	0.000154603
1274	AK098263	-0.146369922	0.071959111
1275	AK098303	-0.441570289	1.24E-08
1276	AK098333	-0.021883226	0.78900767
1277	AK098438	-0.042394941	0.604040769
1278	AK098481	0.041845898	0.608737551
1279	AK098491	-0.050671762	0.53528095
1280	AK098656	0.088024777	0.280864888
1281	AK098665	-0.26943411	0.000788838
1282	AK098705	-0.137647578	0.090820822
1283	AK098727	-0.260496116	0.00119008
1284	AK098763	-0.092343739	0.257839903
1285	AK098769	0.017137529	0.834013542
1286	AK098783	0.29430006	0.000232988
1287	AK1	-0.126786014	0.119587448
1288	AK122764	-0.237891616	0.003165399
1289	AK123141	0.267687791	0.00085578
1290	AK123177	-0.068978418	0.398440785
1291	AK123181	-0.229237664	0.004499596
1292	AK123263	0.346280349	1.24E-05
1293	AK123292	-0.422662746	5.82E-08
1294	AK123298	-0.320957073	5.54E-05
1295	AK123300	0.03043847	0.709699952
1296	AK123314	0.062831849	0.441888172
1297	AK123332	0.058836839	0.471509424
1298	AK123393	-0.403461674	2.55E-07
1299	AK123416	0.022511469	0.783098186
1300	AK123440	-0.062263285	0.446038333
1301	AK123450	0.00294551	0.971270409
1302	AK123459	-0.058550443	0.473673755
1303	AK123543	-0.196393676	0.015309191
1304	AK123582	0.090573316	0.267116495
1305	AK123584	0.612446506	5.10E-17
1306	AK123617	-0.01952118	0.811331033
1307	AK123654	0.10549116	0.195852582
1308	AK123675	-0.11704048	0.151002197
1309	AK123758	-0.198715197	0.014118741
1310	AK123771	0.554427952	1.26E-13
1311	AK123826	0.007724261	0.92475459
1312	AK123834	-0.063033989	0.440417968
1313	AK123868	-0.018341239	0.822540851
1314	AK123872	0.249888678	0.001903995
1315	AK123878	-0.367589151	3.18E-06
1316	AK123889	0.076256707	0.350430098
1317	AK123891	-0.181114105	0.025549452
1318	AK123934	-0.293951401	0.000237192
1319	AK123947	-0.168470768	0.038009271
1320	AK123976	-0.222610289	0.005841563
1321	AK123998	0.139328597	0.086907978
1322	AK124056	0.037623975	0.64537743
1323	AK124066	0.553770109	1.36E-13
1324	AK124121	-0.011461938	0.88854121
1325	AK124130	0.100066295	0.219974012
1326	AK124131	0.246094688	0.002241944
1327	AK124194	0.436139375	1.95E-08
1328	AK124197	-0.09894931	0.225191994
1329	AK124226	0.35043052	9.60E-06
1330	AK124233	0.050119857	0.539741617
1331	AK124262	-0.314584917	7.91E-05
1332	AK124272	-0.063193267	0.439261463
1333	AK124308	0.182797567	0.024189672
1334	AK124326	-0.208222059	0.010046593
1335	AK124327	-0.36425482	3.96E-06
1336	AK124399	0.066669267	0.414455983
1337	AK124433	-0.288354149	0.000315108
1338	AK124439	-0.060187582	0.461374794
1339	AK124465	-0.010904679	0.893927612
1340	AK124484	0.054290221	0.50649856
1341	AK124523	-0.028585325	0.726649593
1342	AK124578	-0.219407938	0.006609832
1343	AK124673	-0.063230576	0.43899082
1344	AK124680	-0.260042147	0.001214742
1345	AK124682	-0.123735431	0.128822317
1346	AK124806	0.419832389	7.28E-08
1347	AK124820	0.236555853	0.003344703
1348	AK124832	0.042536063	0.60283615
1349	AK124857	-0.308203766	0.000112054
1350	AK124930	0.220575812	0.006319809
1351	AK124939	-0.188095263	0.020308229
1352	AK124950	-0.103102957	0.206223955
1353	AK124970	-0.019067561	0.815636162
1354	AK124973	-0.102041363	0.210958821
1355	AK125001	0.701644926	7.66E-24
1356	AK125040	-0.096481958	0.23702684
1357	AK125051	0.194813546	0.01616866
1358	AK125078	-0.105823451	0.194440067
1359	AK125157	-0.245935491	0.002257246
1360	AK125212	-0.29622171	0.000211029
1361	AK125237	-0.226982047	0.004921573
1362	AK125257	-0.197766803	0.014594927
1363	AK125301	-0.100097934	0.219827472
1364	AK125311	-0.110845581	0.173985598
1365	AK125333	-0.090352725	0.268288062
1366	AK125397	0.306709741	0.000121438
1367	AK125437	0.319532458	6.00E-05
1368	AK125463	-0.325789205	4.21E-05
1369	AK125489	0.198312415	0.014319293
1370	AK125500	-0.061919565	0.448557894
1371	AK125516	-0.204435613	0.011524274
1372	AK125532	-0.404341745	2.39E-07
1373	AK125558	0.087168728	0.285587805
1374	AK125594	0.489533794	1.55E-10
1375	AK125598	0.072830224	0.372562353
1376	AK125599	0.530082362	2.17E-12
1377	AK125676	-0.001812122	0.982322772
1378	AK125699	-0.201328767	0.012876031
1379	AK125701	0.101295625	0.214331136
1380	AK125726	-0.31999272	5.85E-05
1381	AK125727	0.156504883	0.054169825
1382	AK125737	-0.30188029	0.000157033
1383	AK125749	-0.022808497	0.780308516
1384	AK125759	-0.055178014	0.499561929
1385	AK125769	-0.111393986	0.171852217
1386	AK125821	-0.249965228	0.001897681
1387	AK125858	-0.225609989	0.005195265
1388	AK125860	-0.00154481	0.984930066
1389	AK125871	-0.310591604	9.84E-05
1390	AK125955	-0.419551174	7.44E-08
1391	AK125960	-0.148784079	0.067341675
1392	AK125994	-0.250150548	0.001882473
1393	AK126075	-0.305661776	0.000128453
1394	AK126080	-0.198914223	0.014020552
1395	AK126180	0.180834363	0.025781635
1396	AK126213	-0.150853314	0.063578736
1397	AK126225	0.581514449	3.98E-15
1398	AK126251	0.208340663	0.010003138
1399	AK126253	0.551979018	1.69E-13
1400	AK126266	0.324098163	4.64E-05
1401	AK126278	-0.105974693	0.193799618
1402	AK126286	-0.160115466	0.048784251
1403	AK126307	-0.285382642	0.000365531
1404	AK126318	-0.180550808	0.026018825
1405	AK126351	-0.053529941	0.512478501
1406	AK126380	-0.378429163	1.53E-06
1407	AK126532	-0.14433324	0.076051309
1408	AK126539	-0.139389737	0.086768246
1409	AK126616	0.096836215	0.235301376
1410	AK126635	-0.485022061	2.41E-10
1411	AK126693	-0.109888455	0.177755782
1412	AK126717	-0.090054479	0.2698776
1413	AK126744	-0.230181629	0.00433285
1414	AK126852	-0.372253177	2.33E-06
1415	AK127026	-0.165827268	0.041177599
1416	AK127087	0.135502882	0.096015145
1417	AK127120	-0.228345939	0.004662378
1418	AK127124	-0.068947754	0.39865101
1419	AK127179	-0.037642192	0.645217403
1420	AK127183	0.29895837	0.000183061
1421	AK127190	0.017901648	0.826726424
1422	AK127191	-0.10993494	0.177571296
1423	AK127224	0.26789318	0.000847645
1424	AK127270	-0.55349728	1.41E-13
1425	AK127309	-0.155244826	0.056161277
1426	AK127339	0.012049405	0.882868343
1427	AK127378	-0.282939172	0.000412483
1428	AK127380	-0.305871181	0.000127022
1429	AK127400	-0.164634113	0.042678567
1430	AK127443	0.032513425	0.690889258
1431	AK127472	0.073468418	0.368376448
1432	AK127555	-0.220245223	0.006400733
1433	AK127557	0.069020806	0.398150294
1434	AK127609	0.23506804	0.003555155
1435	AK127697	0.070144694	0.390494288
1436	AK127787	-0.106388469	0.192055279
1437	AK127846	-0.042072715	0.606795289
1438	AK127919	-0.239073671	0.003014011
1439	AK127963	0.052677949	0.519222824
1440	AK127966	-0.151870748	0.061792587
1441	AK127974	-0.139270528	0.08704086
1442	AK128013	0.273308376	0.000657154
1443	AK128153	-0.059966838	0.463022761
1444	AK128202	-0.032634954	0.689793222
1445	AK128216	-0.065967796	0.419394682
1446	AK128252	0.009311885	0.909349265
1447	AK128346	-0.234053894	0.003705365
1448	AK128400	-0.057353883	0.482774559
1449	AK128414	-0.118178945	0.147039866
1450	AK128439	0.424942952	4.85E-08
1451	AK128486	-0.136495038	0.093583672
1452	AK128525	0.614348088	3.84E-17
1453	AK128534	-0.206231767	0.010801056
1454	AK128559	-0.252071122	0.001731266
1455	AK128563	-0.193806574	0.016738018
1456	AK128569	0.210802375	0.009137848
1457	AK128593	0.045704873	0.57607419
1458	AK128619	0.125982971	0.121967143
1459	AK128652	0.54885162	2.47E-13
1460	AK128656	-0.088538469	0.27805614
1461	AK128673	-0.375057102	1.93E-06
1462	AK128697	0.055614158	0.496172566
1463	AK128707	-0.17409725	0.031944369
1464	AK128708	-0.105318466	0.196589614
1465	AK128734	0.383717808	1.06E-06
1466	AK128777	-0.19491243	0.01611367
1467	AK128833	-0.086765829	0.287828929
1468	AK128880	0.112076513	0.16922422
1469	AK129567	-0.066568734	0.415161691
1470	AK129672	-0.053211544	0.514993612
1471	AK129879	-0.110267828	0.176254267
1472	AK129926	0.050095147	0.539941763
1473	AK129935	-0.24359448	0.002493477
1474	AK130076	0.069309859	0.396172743
1475	AK130110	-0.103971381	0.202407859
1476	AK130294	-0.380100525	1.37E-06
1477	AK130329	-0.201958862	0.012591169
1478	AK130400	0.033032667	0.686210884
1479	AK130481	0.097894769	0.230198027
1480	AK130486	0.094268415	0.248008743
1481	AK130759	-0.045478172	0.577970216
1482	AK130765	0.085444768	0.295259536
1483	AK130824	-0.01238294	0.879650186
1484	AK130904	-0.446634614	8.04E-09
1485	AK130911	-0.41220311	1.32E-07
1486	AK131020	0.186683241	0.021286203
1487	AK131325	0.494015749	9.95E-11
1488	AK131337	-0.068392659	0.402468006
1489	AK131347	0.367989445	3.10E-06
1490	AK131520	-0.151125336	0.063097104
1491	AK172755	0.216227401	0.007460619
1492	AK2	0.203758344	0.011807825
1493	AK289390	0.461417696	2.19E-09
1494	AK291164	-0.40537573	2.21E-07
1495	AK291611	0.587305629	1.82E-15
1496	AK293020	0.072011927	0.377972036
1497	AK294004	-0.167032543	0.039706581
1498	AK294743	-0.172631527	0.033439275
1499	AK294819	0.049352228	0.545976317
1500	AK294973	-0.213149181	0.008375226
1501	AK295617	-0.243199918	0.002535428
1502	AK295707	0.027701091	0.734784694
1503	AK296065	-0.159965073	0.048999342
1504	AK296146	-0.126017826	0.1218631
1505	AK296148	0.269327011	0.000792801
1506	AK296947	0.504864465	3.30E-11
1507	AK297683	-0.05685063	0.486630101
1508	AK297919	0.297462665	0.000197887
1509	AK298056	0.200959765	0.013045463
1510	AK298300	-0.196061501	0.015486488
1511	AK298596	0.132792708	0.102912551
1512	AK299432	0.027811376	0.733768416
1513	AK299452	0.214942764	0.007830941
1514	AK299501	0.454116978	4.20E-09
1515	AK3	-0.006913244	0.932635358
1516	AK300387	0.032899568	0.687408987
1517	AK300656	0.199372843	0.01379656
1518	AK300962	0.135518632	0.09597616
1519	AK301093	0.69695611	2.02E-23
1520	AK301549	0.133730509	0.100483009
1521	AK301666	0.043058296	0.598387703
1522	AK301968	-0.141350268	0.082381933
1523	AK302092	-0.03425823	0.675215942
1524	AK302511	-0.130210469	0.109841657
1525	AK302694	0.125790112	0.12254407
1526	AK303207	-0.097351288	0.232808362
1527	AK303572	0.173871273	0.032171079
1528	AK303607	0.082454471	0.312545071
1529	AK304483	-0.119404517	0.142862878
1530	AK304759	-0.039605956	0.628063475
1531	AK304826	-0.269483611	0.000787013
1532	AK307150	0.425140046	4.78E-08
1533	AK307172	-0.167536047	0.039105271
1534	AK307192	0.356841346	6.40E-06
1535	AK307207	0.165498139	0.041587148
1536	AK307233	0.387188012	8.32E-07
1537	AK307246	-0.191674821	0.018001097
1538	AK307275	0.089031182	0.275379939
1539	AK307870	-0.212798054	0.008485617
1540	AK308309	0.130310203	0.109567424
1541	AK308439	-0.133838891	0.100205169
1542	AK308544	-0.134379134	0.098829273
1543	AK308561	0.485561179	2.29E-10
1544	AK308605	0.106038631	0.193529326
1545	AK308652	-0.027301547	0.738470313
1546	AK308704	0.108558359	0.183094627
1547	AK308867	0.049093686	0.548084126
1548	AK308944	-0.158491612	0.051148653
1549	AK308965	-0.151375077	0.062657554
1550	AK309109	-0.013670644	0.867244546
1551	AK309215	0.042941469	0.599381569
1552	AK309255	-0.196847498	0.015069826
1553	AK309441	0.000395218	0.996144361
1554	AK309476	0.239240745	0.00299315
1555	AK309533	0.233938707	0.003722782
1556	AK309744	0.086654086	0.288452578
1557	AK309896	-0.044813113	0.583549177
1558	AK309922	0.073730908	0.366663229
1559	AK309988	-0.111851719	0.17008645
1560	AK310013	-0.340907122	1.73E-05
1561	AK310030	0.273600424	0.000648098
1562	AK310041	-0.138891892	0.08791129
1563	AK310046	0.475771714	5.85E-10
1564	AK310094	0.018083576	0.824993591
1565	AK310146	0.330847372	3.14E-05
1566	AK310226	0.142953922	0.078927951
1567	AK310228	-0.290255984	0.000286305
1568	AK310237	-0.106339393	0.192261565
1569	AK310239	0.019031989	0.815973992
1570	AK310441	-0.103613201	0.203975583
1571	AK310472	-0.015770927	0.847081165
1572	AK310493	0.03782028	0.643653856
1573	AK310526	0.238208298	0.003124182
1574	AK310634	0.237340655	0.003238278
1575	AK310665	-0.249138395	0.001966903
1576	AK310751	0.232591162	0.003932082
1577	AK310794	-0.168170509	0.038358483
1578	AK310876	-0.190112629	0.018978427
1579	AK311005	-0.228374062	0.004657164
1580	AK311108	0.046465721	0.569732131
1581	AK311113	-0.241102722	0.002769322
1582	AK311120	-0.167905336	0.03866913
1583	AK311131	0.072332758	0.375845374
1584	AK311167	0.047373201	0.562211225
1585	AK311213	0.576482605	7.74E-15
1586	AK311257	0.333543697	2.68E-05
1587	AK311282	0.266563482	0.000901597
1588	AK311342	-0.237669478	0.003194603
1589	AK311356	-0.042079701	0.606735511
1590	AK311374	0.404460965	2.37E-07
1591	AK311380	0.192850998	0.017294348
1592	AK311383	-0.068340797	0.402825732
1593	AK311445	-0.172618873	0.033452433
1594	AK311458	-0.134126812	0.099470018
1595	AK311497	-0.021771883	0.790056269
1596	AK311558	-0.363198007	4.25E-06
1597	AK311573	-0.104489028	0.200157547
1598	AK311578	0.194887646	0.016127437
1599	AK311660	-0.081748546	0.316720076
1600	AK313893	-0.041092602	0.615207652
1601	AK316092	-0.138587394	0.088616316
1602	AK316321	-0.038320983	0.639266245
1603	AK4	-0.234528041	0.00363444
1604	AK5	-0.3074865	0.000116471
1605	AK7	-0.278623694	0.00050926
1606	AK8	-0.239120329	0.003008172
1607	AK9	0.111886189	0.169954025
1608	AKAP1	-0.228559148	0.004622984
1609	AKAP10	0.492572015	1.15E-10
1610	AKAP11	0.126714138	0.119798963
1611	AKAP12	-0.285993768	0.000354588
1612	AKAP13	0.083363322	0.307223
1613	AKAP14	0.055555332	0.496629008
1614	AKAP17A	0.352586563	8.39E-06
1615	AKAP2	0.185635544	0.022037841
1616	AKAP3	0.190653724	0.018634833
1617	AKAP4	-0.02311841	0.777400809
1618	AKAP5	0.647061219	2.13E-19
1619	AKAP6	-0.505821326	2.99E-11
1620	AKAP7	0.167226252	0.039474331
1621	AKAP8	0.140310707	0.084685049
1622	AKAP8L	0.208703053	0.009871386
1623	AKAP9	0.176137273	0.029958403
1624	AKIP1	0.252693737	0.001684674
1625	AKIRIN1	0.50880251	2.19E-11
1626	AKIRIN2	0.371337366	2.48E-06
1627	AKNA	0.541432367	5.92E-13
1628	AKNAD1	-0.380220402	1.35E-06
1629	AKR1A1	0.599707315	3.25E-16
1630	AKR1B1	0.258571349	0.001297889
1631	AKR1B10	-0.33169481	2.99E-05
1632	AKR1B15	-0.380877767	1.29E-06
1633	AKR1C1	-0.401482647	2.95E-07
1634	AKR1C2	-0.445393437	8.94E-09
1635	AKR1C3	-0.227254477	0.004868792
1636	AKR1C4	-0.209657301	0.009531752
1637	AKR1CL1	-0.403784366	2.49E-07
1638	AKR1D1	0.239369539	0.002977157
1639	AKR1E2	-0.348934813	1.05E-05
1640	AKR7A2	0.077740293	0.341108953
1641	AKR7A2P1	0.050948594	0.53305045
1642	AKR7A3	-0.146399841	0.071900353
1643	AKR7L	-0.136416394	0.093774604
1644	AKT1	0.220040398	0.006451333
1645	AKT1S1	0.160997844	0.047538031
1646	AKT2	-0.072904747	0.372072061
1647	AKT3	-0.244144159	0.002436081
1648	AKTIP	0.005756192	0.943889737
1649	AL022344.5:ENSG00000234864	-0.13733808	0.091556288
1650	AL022344.7:ENSG00000259869	-0.289126031	0.000303108
1651	AL035610.1:ENSG00000232079	-0.273519487	0.000650596
1652	AL035610.2:ENSG00000236532	0.141450113	0.082163402
1653	AL049415	0.440649884	1.34E-08
1654	AL049935	0.491851158	1.23E-10
1655	AL049948	-0.004172618	0.959310346
1656	AL050000	-0.061536853	0.451372662
1657	AL050085	0.022404331	0.784105092
1658	AL050132	0.15326638	0.059409581
1659	AL109706	-0.067000043	0.412139024
1660	AL109718	0.021580281	0.791861606
1661	AL109792	0.125282764	0.12407186
1662	AL110171	0.057033802	0.485224871
1663	AL110181	-0.093391212	0.252456771
1664	AL117485	-0.190519476	0.018719574
1665	AL122050	-0.336580207	2.24E-05
1666	AL122127.25:ENSG00000244620	0.392463704	5.71E-07
1667	AL132709.1:ENSG00000230805	0.059589249	0.465849159
1668	AL132709.5:ENSG00000225746	-0.196774557	0.015108076
1669	AL132709.8:ENSG00000232018	-0.208062406	0.010105351
1670	AL133245.2:ENSG00000272754	-0.11625654	0.153777109
1671	AL133493.2:ENSG00000233922	0.276323064	0.000569033
1672	AL133568	-0.060969176	0.455565973
1673	AL137445	0.36194691	4.61E-06
1674	AL137522	0.179284772	0.027100761
1675	AL137535	-0.479328309	4.17E-10
1676	AL137551	-0.029441059	0.718805644
1677	AL137655	-0.134095773	0.099549066
1678	AL137752	-0.394228252	5.03E-07
1679	AL157440	-0.380564347	1.32E-06
1680	AL161668.5:ENSG00000258604	-0.186055438	0.0217339
1681	AL162052	-0.249881417	0.001904595
1682	AL163953.3:ENSG00000237356	-0.009027159	0.912109757
1683	AL355711	0.219466073	0.006595119
1684	AL357213	0.034018985	0.677356998
1685	AL360260	-0.418856846	7.86E-08
1686	AL389983	-0.004936609	0.95186848
1687	AL390170	-0.114370992	0.160608315
1688	AL589743.1:ENSG00000225210	-0.183945603	0.023298404
1689	AL592494.5:ENSG00000227082	-0.026655169	0.744445444
1690	AL831889	-0.001592017	0.984469604
1691	AL831948	-0.079825477	0.328276414
1692	AL832007	-0.191343618	0.018204576
1693	AL832096	-0.189899283	0.019115401
1694	AL832163	0.101214397	0.214700771
1695	AL832184	-0.087908725	0.281502064
1696	AL832212	-0.080967761	0.321379812
1697	AL832252	0.190035095	0.019028108
1698	AL832378	-0.229979531	0.004368076
1699	AL832384	-0.212650005	0.008532547
1700	AL832439	-0.08266583	0.311302055
1701	AL832447	-0.224808151	0.005361442
1702	AL832593	0.157788666	0.052201234
1703	AL832615	-0.009775121	0.904860402
1704	AL832737	0.061716929	0.450047012
1705	AL832797	-0.068882221	0.39910051
1706	AL832891	-0.090103357	0.269616661
1707	AL832909	0.578812871	5.70E-15
1708	AL832937	-0.186655878	0.021305549
1709	AL833139	-0.356001664	6.76E-06
1710	AL833150	-0.287417582	0.000330259
1711	AL833181	0.555091294	1.16E-13
1712	AL833346	0.082567328	0.311880948
1713	AL833455	0.307269472	0.00011784
1714	AL833634	-0.030677145	0.707527021
1715	AL953854.2-002	-0.244467417	0.00240289
1716	ALAD	-0.024138997	0.767847332
1717	ALAS1	0.470894028	9.23E-10
1718	ALAS2	-0.202577041	0.012317077
1719	ALB	-0.166010576	0.04095097
1720	ALCAM	0.565687486	3.11E-14
1721	ALDH16A1	0.282290115	0.000425861
1722	ALDH18A1	0.346584176	1.22E-05
1723	ALDH1A1	0.308303179	0.000111454
1724	ALDH1A2	-0.106089165	0.193315892
1725	ALDH1A3	0.128891595	0.113518806
1726	ALDH1B1	0.131916446	0.105224234
1727	ALDH1L1	-0.438643955	1.58E-08
1728	ALDH1L1-AS2	-0.39103068	6.33E-07
1729	ALDH1L2	0.184881453	0.022592886
1730	ALDH2	0.189445683	0.019409471
1731	ALDH3A1	-0.168998796	0.037401649
1732	ALDH3A2	-0.123490399	0.129587248
1733	ALDH3B1	0.13056619	0.108866004
1734	ALDH3B2	-0.04303879	0.598553592
1735	ALDH4A1	-0.066541663	0.415351839
1736	ALDH5A1	0.115614045	0.156079821
1737	ALDH6A1	-0.2087497	0.009854539
1738	ALDH7A1	-0.151147389	0.063058189
1739	ALDH8A1	0.157640066	0.052426027
1740	ALDH9A1	0.255590251	0.001482573
1741	ALDOA	0.183304117	0.023792872
1742	ALDOB	-0.135781922	0.095326298
1743	ALDOC	0.139449894	0.086630934
1744	ALG1	0.511162432	1.71E-11
1745	ALG10	0.247934035	0.002071841
1746	ALG10B	-0.105917453	0.194041825
1747	ALG11	0.223243097	0.005699539
1748	ALG12	0.253376113	0.001634924
1749	ALG13	0.224852723	0.005352082
1750	ALG14	0.292938787	0.000249808
1751	ALG1L	-0.070995197	0.384759897
1752	ALG1L2	0.327547972	3.80E-05
1753	ALG1L9P	-0.249336279	0.001950131
1754	ALG2	0.516487091	9.68E-12
1755	ALG3	0.504122969	3.56E-11
1756	ALG5	0.534239584	1.36E-12
1757	ALG6	0.436975122	1.82E-08
1758	ALG8	0.461331012	2.21E-09
1759	ALG9	0.199113484	0.013922845
1760	ALK	-0.180219447	0.026298367
1761	ALKBH1	0.439464801	1.48E-08
1762	ALKBH2	-0.056576237	0.488739216
1763	ALKBH3	0.185334685	0.022257863
1764	ALKBH4	0.280840907	0.000457189
1765	ALKBH5	0.164139655	0.043313872
1766	ALKBH6	0.317478084	6.74E-05
1767	ALKBH7	0.151910361	0.061723885
1768	ALKBH8	0.236835126	0.003306476
1769	ALLC	-0.168756055	0.037679957
1770	ALMS1	-0.033216215	0.684559957
1771	ALMS1P	-0.174644531	0.031400924
1772	ALOX12	-0.264620284	0.000986124
1773	ALOX12P2	0.426646078	4.23E-08
1774	ALOX15	0.171937435	0.034167603
1775	ALOX15B	0.229811714	0.004397521
1776	ALOX15P1	0.44414195	9.95E-09
1777	ALOX5	0.661125793	1.87E-20
1778	ALOX5AP	0.23792512	0.003161015
1779	ALOXE3	-0.137683024	0.090736891
1780	ALPK1	0.375504241	1.87E-06
1781	ALPK2	0.282003306	0.000431899
1782	ALPK3	-0.518241143	8.02E-12
1783	ALPL	0.254447759	0.001559489
1784	ALS2	-0.032960751	0.686858143
1785	ALS2CL	-0.355058318	7.17E-06
1786	ALS2CR11	-0.409834925	1.58E-07
1787	ALS2CR12	-0.208654974	0.009888778
1788	ALS2CR8	-0.017471537	0.830826452
1789	ALX1	-0.023217178	0.776474778
1790	ALX4	-0.375225203	1.91E-06
1791	ALYREF	0.4613928	2.20E-09
1792	AM992879:uc011nad.1	-0.134918105	0.097471536
1793	AMACR	0.181911113	0.024897736
1794	AMBN	-0.119211005	0.143516342
1795	AMBP	-0.063212777	0.439119923
1796	AMBRA1	0.266061275	0.000922781
1797	AMD1	0.396058824	4.40E-07
1798	AMDHD1	0.358153763	5.89E-06
1799	AMDHD2	0.289915503	0.000291275
1800	AMER1	-0.147887873	0.069026803
1801	AMER2	0.38681937	8.54E-07
1802	AMFR	0.030978135	0.70479013
1803	AMH	-0.068229123	0.403596654
1804	AMHR2	-0.046054804	0.573153235
1805	AMICA1	0.568877681	2.07E-14
1806	AMIGO1	0.009364973	0.908834679
1807	AMIGO2	0.115121745	0.157861684
1808	AMIGO3	-0.025839338	0.752008766
1809	AMMECR1	0.3857629	9.20E-07
1810	AMMECR1L	-0.023289805	0.775794052
1811	AMN	0.053881449	0.509709216
1812	AMN1	0.347490276	1.15E-05
1813	AMOT	-0.453672214	4.37E-09
1814	AMOTL1	-0.446342637	8.24E-09
1815	AMOTL2	-0.47172518	8.54E-10
1816	AMPD1	0.460637399	2.35E-09
1817	AMPD2	0.173800047	0.032242818
1818	AMPD3	0.747730192	1.83E-28
1819	AMPH	-0.406013253	2.11E-07
1820	AMT	-0.213859687	0.008155731
1821	AMTN	0.112439694	0.167838056
1822	AMY1A	-0.039878978	0.625693968
1823	AMY2A	-0.223639443	0.005612164
1824	AMY2B	-0.220599377	0.006314076
1825	AMZ1	0.100721051	0.216955553
1826	AMZ2	0.452515653	4.83E-09
1827	AMZ2P1	0.122180789	0.133734881
1828	ANAPC1	0.267083888	0.000880117
1829	ANAPC10	0.27099152	0.000733233
1830	ANAPC11	0.289376393	0.000299308
1831	ANAPC13	0.365131285	3.74E-06
1832	ANAPC15	0.351174865	9.17E-06
1833	ANAPC16	0.162508678	0.04546577
1834	ANAPC1P1	0.495836308	8.29E-11
1835	ANAPC2	0.087548756	0.283484629
1836	ANAPC4	0.328791747	3.54E-05
1837	ANAPC5	0.225427416	0.005232692
1838	ANAPC7	0.409572173	1.61E-07
1839	ANG	-0.183150348	0.02391273
1840	ANGEL1	0.436145286	1.95E-08
1841	ANGEL2	0.116862712	0.151628109
1842	ANGPT1	-0.145535148	0.073614249
1843	ANGPT2	-0.038002206	0.642058221
1844	ANGPT4	-0.3867225	8.60E-07
1845	ANGPTL1	-0.31258444	8.83E-05
1846	ANGPTL2	-0.344144429	1.42E-05
1847	ANGPTL3	-0.124192893	0.127403523
1848	ANGPTL4	-0.115367123	0.15697165
1849	ANGPTL5	-0.324069794	4.64E-05
1850	ANGPTL6	-0.059203016	0.468750048
1851	ANGPTL7	-0.338352732	2.01E-05
1852	ANK1	-0.121780669	0.135022159
1853	ANK2	-0.390749151	6.46E-07
1854	ANK3	-0.181749381	0.02502882
1855	ANKAR	-0.002986506	0.970870726
1856	ANKDD1A	-0.241495271	0.002724112
1857	ANKDD1B	0.145882338	0.072922156
1858	ANKEF1	0.295923876	0.000214301
1859	ANKFN1	-0.238954475	0.003028975
1860	ANKFY1	0.30766608	0.00011535
1861	ANKH	-0.171546088	0.03458414
1862	ANKHD1	0.259272372	0.001257631
1863	ANKHD1-EIF4EBP3	0.184177231	0.023122044
1864	ANKIB1	0.248724379	0.002002419
1865	ANKK1	-0.022751335	0.780845158
1866	ANKLE1	0.181835562	0.024958897
1867	ANKLE2	0.152638982	0.060471337
1868	ANKMY1	0.191986531	0.017811397
1869	ANKMY2	0.148949005	0.067035247
1870	ANKRA2	0.301239238	0.000162429
1871	ANKRD1	-0.122517636	0.132658475
1872	ANKRD10	0.110963898	0.173523677
1873	ANKRD11	-0.078894711	0.3339657
1874	ANKRD12	0.273756433	0.000643307
1875	ANKRD13A	0.553796703	1.36E-13
1876	ANKRD13B	-0.4220688	6.10E-08
1877	ANKRD13C	0.156140253	0.054740012
1878	ANKRD13D	0.356759779	6.44E-06
1879	ANKRD16	0.107396505	0.187853634
1880	ANKRD17	0.139683774	0.086098742
1881	ANKRD18A	0.344918018	1.35E-05
1882	ANKRD18B	-0.206732886	0.010606544
1883	ANKRD18DP	0.28329295	0.000405357
1884	ANKRD19P	-0.073183699	0.370240322
1885	ANKRD2	-0.11367674	0.163179911
1886	ANKRD20A11P	0.195896124	0.015575422
1887	ANKRD20A12P	-0.27071167	0.000742951
1888	ANKRD20A19P	-0.172995443	0.033062691
1889	ANKRD20A3	-0.008333322	0.918841018
1890	ANKRD20A4	0.046102244	0.572757784
1891	ANKRD20A5P	0.279616267	0.000485307
1892	ANKRD20A8P	-0.001893806	0.981526083
1893	ANKRD20A9P	0.077545445	0.34232411
1894	ANKRD22	0.619859841	1.67E-17
1895	ANKRD23	-0.062908852	0.441327788
1896	ANKRD24	0.087616193	0.283112501
1897	ANKRD26	0.046555244	0.568988086
1898	ANKRD26P1	-0.016976786	0.835548301
1899	ANKRD26P3	0.155162284	0.05629381
1900	ANKRD27	0.276174176	0.000573116
1901	ANKRD28	0.021333003	0.794193171
1902	ANKRD29	-0.12969661	0.111263108
1903	ANKRD30A	-0.38668407	8.62E-07
1904	ANKRD30B	-0.328703877	3.56E-05
1905	ANKRD30BP2	-0.11590743	0.155025133
1906	ANKRD30BP3	-0.139956654	0.085481114
1907	ANKRD31	-0.043482157	0.594788086
1908	ANKRD32	0.560643762	5.85E-14
1909	ANKRD33	-0.036147821	0.658398101
1910	ANKRD33B	0.043983187	0.590545781
1911	ANKRD34A	0.029241826	0.720629294
1912	ANKRD34B	0.094442719	0.247131407
1913	ANKRD34C	0.132213871	0.104435062
1914	ANKRD35	-0.421094652	6.59E-08
1915	ANKRD36	0.091785563	0.260740423
1916	ANKRD36B	0.073896088	0.365587654
1917	ANKRD36BP1	-0.23145992	0.00411589
1918	ANKRD36BP2	0.562678144	4.54E-14
1919	ANKRD36C	-0.013268641	0.87111408
1920	ANKRD37	0.144831086	0.075034057
1921	ANKRD39	0.30208389	0.000155354
1922	ANKRD40	-0.03435012	0.674394287
1923	ANKRD42	-0.065546428	0.422377715
1924	ANKRD44	0.752324315	5.58E-29
1925	ANKRD45	0.03954138	0.628624478
1926	ANKRD46	0.093248157	0.253187347
1927	ANKRD49	0.500560992	5.14E-11
1928	ANKRD50	-0.160082051	0.048831974
1929	ANKRD52	0.051287679	0.530324726
1930	ANKRD53	-0.150239623	0.064676362
1931	ANKRD54	0.200321124	0.013343317
1932	ANKRD55	0.463046412	1.89E-09
1933	ANKRD6	-0.280360999	0.000468023
1934	ANKRD61	-0.184777322	0.022670468
1935	ANKRD62	-0.073715858	0.366761322
1936	ANKRD65	0.03059297	0.708293094
1937	ANKRD7	0.16963873	0.036676241
1938	ANKRD9	-0.091303901	0.263261234
1939	ANKS1A	-0.032716026	0.689062418
1940	ANKS1B	-0.43334794	2.45E-08
1941	ANKS3	-0.058579969	0.473450374
1942	ANKS4B	-0.140693078	0.083831996
1943	ANKS6	-0.314820568	7.81E-05
1944	ANKUB1	0.006925322	0.932517944
1945	ANKZF1	0.327171002	3.89E-05
1946	ANLN	0.465726302	1.48E-09
1947	ANO1	-0.123151393	0.130651299
1948	ANO10	0.03009116	0.712866076
1949	ANO2	-0.344876813	1.35E-05
1950	ANO3	-0.469236243	1.08E-09
1951	ANO4	-0.386531337	8.71E-07
1952	ANO5	0.020489506	0.802160029
1953	ANO6	-0.092550897	0.25676908
1954	ANO7	-0.124858659	0.12536023
1955	ANO8	-0.031984924	0.695663075
1956	ANO9	0.613594676	4.30E-17
1957	ANP32A	0.367830971	3.13E-06
1958	ANP32A-IT1	0.125144361	0.124491178
1959	ANP32AP1	0.039497475	0.62900602
1960	ANP32B	0.05107832	0.532006823
1961	ANP32C	-0.119549337	0.14237532
1962	ANP32D	-0.125306363	0.124000469
1963	ANP32E	0.304028175	0.000140146
1964	ANPEP	0.10153194	0.213258352
1965	ANTXR1	-0.359942154	5.25E-06
1966	ANTXR2	0.287391812	0.000330685
1967	ANXA1	0.041372544	0.61279972
1968	ANXA11	-0.004743887	0.953745377
1969	ANXA13	0.04839183	0.553826131
1970	ANXA2	0.210335436	0.009296703
1971	ANXA2P1	0.017407613	0.831436202
1972	ANXA2P2	0.147820965	0.069153972
1973	ANXA2P3	0.124888874	0.125268101
1974	ANXA2R	0.377902493	1.59E-06
1975	ANXA3	-0.255212541	0.00150761
1976	ANXA4	-0.008942179	0.912933864
1977	ANXA5	0.133924857	0.099985225
1978	ANXA6	0.322248195	5.15E-05
1979	ANXA7	0.136930503	0.092532041
1980	ANXA8	-0.188746535	0.019870391
1981	ANXA8L2	-0.299199808	0.000180767
1982	ANXA9	0.255378024	0.001496594
1983	AOAH	0.748334814	1.57E-28
1984	AOAH-IT1	0.452672601	4.76E-09
1985	AOC2	-0.50160903	4.62E-11
1986	AOC3	-0.441751361	1.22E-08
1987	AOC4	-0.454237171	4.15E-09
1988	AOX1	-0.043678632	0.593122854
1989	AOX2P	-0.016263143	0.842369544
1990	AP000221.1:ENSG00000229962	-0.008688451	0.915394981
1991	AP000230.1:ENSG00000273492	-0.110404338	0.175716271
1992	AP000253.1:ENSG00000234509	-0.091843236	0.260439699
1993	AP000255.6:ENSG00000273091	-0.052099895	0.523824367
1994	AP000265.1:ENSG00000261610	-0.086829686	0.287472948
1995	AP000282.3:ENSG00000228961	-0.084202657	0.302361086
1996	AP000295.10:ENSG00000272659	0.031435761	0.700636207
1997	AP000318.2:ENSG00000214955	-0.079000492	0.333315959
1998	AP000343.2:ENSG00000236611	-0.041713804	0.609869939
1999	AP000344.3:ENSG00000234928	-0.099889896	0.220792298
[truncated: 23,050 more rows]
